# 1           **Myotube hypertrophy is associated with cancer-like** 2           **metabolic reprogramming and limited by PHGDH**

3  
4 Lian E.M. Stadhouders<sup>1)</sup>, Sander A.J. Verbrugge<sup>2)</sup>, Jonathon A.B. Smith<sup>4)</sup>, Brendan M. Gabriel<sup>3,4)</sup>, Tim D.  
5 Hammersen<sup>1)</sup>, Detmar Kolijn<sup>1,5)</sup>, Ilse S.P. Vogel<sup>1)</sup>, Abdalla D. Mohamed<sup>6,7)</sup>, Gerard M.J. de Wit<sup>1)</sup>, Carla  
6 Offringa<sup>1)</sup>, Willem M. Hoogaars<sup>1)</sup>, Sebastian Gehlert<sup>8,9)</sup>, Henning Wackerhage<sup>2)\*</sup>, Richard T. Jaspers<sup>1)\*</sup>

7  
8 \* Joint last authors.

9  
10 Addresses

11 1) Laboratory for Myology, Department of Human Movement Sciences, Faculty of Behavioural and Movement  
12 Sciences, Vrije Universiteit Amsterdam, Amsterdam Movement Sciences, De Boelelaan 1108, 1081 HZ  
13 Amsterdam, The Netherlands

14 2) Exercise Biology, Department for Sport and Health Sciences, Technical University of Munich, Georg-  
15 Brauchle-Ring 60/62, 80992 München/Munich, Germany

16 3) Aberdeen Cardiovascular & Diabetes Centre, The Rowett Institute, University of Aberdeen, Aberdeen, UK

17 4) Physiology and Pharmacology (FYFA), Integrative Physiology, Karolinska Institute, Solnavägen 9, C4 171 65  
18 Solna, Sweden

19 5) Department of Clinical Pharmacology and Molecular Cardiology, Ruhr University Bochum, Bochum,  
20 Germany

21 6) School of Medicine, Medical Sciences and Nutrition, University of Aberdeen, Foresterhill, Aberdeen AB25  
22 2ZD, UK

23 7) Cancer Therapeutics Unit, Target Genomic and Chromosomal Instability, The institute of Cancer Research,  
24 15 Cotswold road, Sutton, London, SM2 5NG, UK

25 8) Department for the Biosciences of Sports, Institute of Sports Science, University of Hildesheim,  
26 Universitätsplatz 1, 31141 Hildesheim, Germany

27 9) Department for Molecular and Cellular Sports Medicine, German Sport University Cologne, 50933 Cologne,  
28 Germany

30 <sup>1</sup> [lianstadhouders@hotmail.com](mailto:lianstadhouders@hotmail.com)

31 <sup>2</sup> [sander.verbrugge@tum.de](mailto:sander.verbrugge@tum.de)

32 <sup>4</sup> [jonathon.smith@ki.se](mailto:jonathon.smith@ki.se)

33 <sup>3</sup> [brendan.gabriel1@abdn.ac.uk](mailto:brendan.gabriel1@abdn.ac.uk)

34 <sup>1</sup> [tim\\_hammersen05@hotmail.de](mailto:tim_hammersen05@hotmail.de)

35 <sup>5</sup> [detmar.kolijn@ruhr-uni-bochum.de](mailto:detmar.kolijn@ruhr-uni-bochum.de)

36 <sup>1</sup> [ilsevogel@gmail.com](mailto:ilsevogel@gmail.com)

37 <sup>6</sup> [a.mohamed.11@aberdeen.ac.uk](mailto:a.mohamed.11@aberdeen.ac.uk)

38 <sup>1</sup> [g.m.j.de.wit@vu.nl](mailto:g.m.j.de.wit@vu.nl)

39 <sup>1</sup> [c.offringa@vu.nl](mailto:c.offringa@vu.nl)

40 <sup>1</sup> [w.m.h.hoogaars@umcg.nl](mailto:w.m.h.hoogaars@umcg.nl)

41 <sup>8</sup> [gehlert@uni-hildesheim.de](mailto:gehlert@uni-hildesheim.de)

42 <sup>2</sup> [henning.wackerhage@tum.de](mailto:henning.wackerhage@tum.de)

43 <sup>1</sup> [r.t.jaspers@vu.nl](mailto:r.t.jaspers@vu.nl)

44

45 **Correspondence to:**

46 Richard Jaspers, PhD

47 Laboratory for Myology,

48 Department of Human Movement Sciences,

49 Faculty of Behavioural and Movement Sciences,

50 Vrije Universiteit Amsterdam,

51 Amsterdam Movement Sciences,

52 De Boelelaan 1108

53 1081 HZ Amsterdam

54 The Netherlands

55 Email: [r.t.jaspers@vu.nl](mailto:r.t.jaspers@vu.nl)

56 Tel: +31 (0) 205988463

57

58

59

60 **Short title:** Warburg effect in myotube hypertrophy

## 61 **Abstract**

62 Muscle fiber size and oxidative metabolism are inversely related, suggesting that a glycolytic metabolism  
63 may offer a growth advantage in muscle fibers. However, the mechanisms underlying this advantage remains  
64 unknown. Nearly 100 years ago, Warburg reported that cancer cells take up more glucose to produce  
65 glycolytic intermediates for anabolic reactions such as amino acid-protein synthesis. The aim of this study  
66 was to test whether glycolysis contributes to anabolic signalling responses and hypertrophy in post-mitotic  
67 muscle cells. Skeletal muscle hypertrophy was induced in vitro by treating mouse C2C12 myotubes with  
68 IGF-1. <sup>14</sup>C glucose was added to differentiation medium and radioactivity in isolated protein was measured.  
69 We exposed differentiated C2C12 and primary mouse myotubes, to 2-deoxyglucose (2DG) and PHGDH  
70 siRNA upon which we assessed myotube diameter and signaling pathways involved in the regulation of  
71 muscle fiber size. Here, we present evidence that, hypertrophying C2C12 myotubes undergo a cancer-like  
72 metabolic reprogramming. First, IGF-1-induced C2C12 myotube hypertrophy increases shunting of carbon  
73 from glucose into protein. Second, reduction of glycolysis through 2-deoxy-D-glucose (2DG) lowers C2C12  
74 and primary myotube size 16-40%. Third, reducing the cancer metabolism-associated enzyme PHGDH  
75 decreases C2C12 and primary myotube size 25-52%, whereas PHGDH overexpression increases C2C12  
76 myotube size ≈20%. Fourth, the muscle hypertrophy-promoting kinase AKT regulates PHGDH expression.  
77 Together these results suggest that glycolysis is important for hypertrophying C2C12 myotubes by  
78 reprogramming their metabolism similar to cancer cells.

79

80 **Key words:** Glycolysis, Hypertrophy, Insulin-Like Growth Factor I, Metabolism, Skeletal muscle,

81 Warburg effect

## 82 1. Introduction

83 Having sufficient muscle mass and strength is associated with low morbidity and mortality (Gabriel and Zierath,  
84 2017; Wolfe, 2006). An individual's muscle mass and strength depend both on genetics (Arden and Spector, 1997;  
85 Verbrugge et al., 2018) and on environmental factors. Of the environmental factors, resistance (strength) training  
86 increases muscle mass and strength in most individuals. (Ahtiainen et al., 2016) Resistance training increases  
87 muscle mass by elevating protein synthesis for up to 48 h (McGlory et al., 2017) or even 72 h post-exercise (Miller  
88 et al., 2005), resulting in a positive protein balance in fed individuals.

89  
90 The main mechanism by which resistance exercise increases protein synthesis is the activation of the  
91 serine/threonine kinase mTOR which is part of the mTORC1 complex (Goodman, 2019). In addition, hypertrophy-  
92 inducing stimuli such as synergist ablation (Chaillou et al., 2013) and acute resistance exercise (Pillon et al., 2020;  
93 Vissing and Schjerling, 2014) extensively change gene expression. Here, one of the most robust changes is the  
94 increased expression of the transcription factor Myc, whose expression increases >10-fold in synergist-ablated,  
95 hypertrophying mouse plantaris (Chaillou et al., 2013) and  $\approx 6$ -fold 2.5 h after resistance exercise in human vastus  
96 lateralis muscle (Pillon et al., 2020; Vissing and Schjerling, 2014).

97  
98 Both *MTOR* and *MYC* are cancer genes (Lawrence et al., 2013) and one of their functions is to contribute to the  
99 metabolic reprogramming seen in cancer cells (DeBerardinis and Chandel, 2016). Nearly 100 years ago, the  
100 metabolic reprogramming of cancer cells was first experimentally demonstrated by Otto Warburg (Warburg et al.,  
101 1927). In a key experiment, the Warburg group compared glucose uptake and lactate production of sarcomas with  
102 that of healthy organs in rats. They noted that sarcomas took up more glucose and produced more lactate than other  
103 organs such as the liver, kidney or brain (Warburg et al., 1927). This demonstrated that cancer cells take up more  
104 glucose and have a higher glycolytic flux in the presence of oxygen. This phenomenon was termed *Warburg effect*  
105 by Efraim Racker in contrast to anaerobic glycolysis or the *Pasteur effect* (Racker, 1972). The purpose of the  
106 metabolic reprogramming of cancer cells was long poorly understood. Today we know that the pathways affected  
107 by metabolic reprogramming vary greatly between different types of cancer (Gaude and Frezza, 2016), both  
108 glycolysis and oxidative phosphorylation can be upregulated (DeBerardinis and Chandel, 2016) and that a key  
109 function of this metabolic reprogramming is to shunt glycolytic intermediates and other metabolites into anabolic  
110 reactions. These anabolic reactions include amino acids into protein and nucleotides into RNA/DNA synthesis,



111 and help cancer cells to produce the biomass necessary for growth and proliferation (DeBerardinis and Chandel,  
112 2016).

113

114 Given that the metabolic reprogramming regulators mTORC1 and MYC are also active in a hypertrophying muscle,  
115 the question arises: Do hypertrophying skeletal muscle fibers reprogram their metabolism in a similar way to that  
116 of cancer cells? Several lines of evidence seem to support this idea. First, resistance exercise not only increases  
117 protein synthesis (McGlory et al., 2017) but also glucose uptake for at least one day post-exercise (Fathinul and  
118 Lau, 2009; Marcus et al., 2013). Second, Semsarian et al. noted that the induction of C2C12 hypertrophy through  
119 IGF-1 was additionally associated with increased lactate synthesis and an elevated expression of lactate  
120 dehydrogenase (Semsarian et al., 1999), which is essentially the Warburg effect. Similarly, muscle activation of  
121 AKT1, a known cancer metabolism regulator (Elstrom et al., 2004), not only causes muscle hypertrophy, but also  
122 increases the expression of glycolytic enzymes (Izumiya et al., 2008). Similarly, mTORC1 activation through a  
123 loss of its inhibitor NPRL2, results in muscle hypertrophy and induces aerobic glycolysis in mice (Dutchak et al.,  
124 2018). Finally, a loss of myostatin both induces muscle hypertrophy and promotes a shift to a more glycolytic  
125 metabolism (Mouisel et al., 2014). Collectively, these data suggest that the stimulation of muscle hypertrophy -  
126 through increased IGF1-AKT1-mTORC1 or reduced myostatin signaling - is associated with increased glycolysis  
127 and a metabolic reprogramming reminiscent to that which occurs in cancer cells (DeBerardinis and Chandel, 2016).

128

129 A specific cancer metabolism-associated enzyme that may contribute to such metabolic reprogramming during  
130 muscle hypertrophy is 3-phosphoglycerate dehydrogenase (PHGDH, E.C. 1.1.1.95). PHGDH channels 3-  
131 phosphoglycerate out of glycolysis, into serine biosynthesis and one-carbon metabolism, which is essential for  
132 nucleotide and amino acid synthesis, epigenetics and redox defense (Ducker and Rabinowitz, 2017; Reid et al.,  
133 2018). The knockdown of *PHGDH* inhibits proliferation of certain cancers (Possemato et al., 2011), endothelial  
134 cells (Vandekeere et al., 2018), and fibroblasts (Hamano et al., 2018), suggesting that PHGDH-mediated metabolic  
135 reprogramming is important for proliferation and cellular growth. Besides, muscle stem cells express more *Phgdh*  
136 when they become activated and start to proliferate (supplementary data of Ryall et al., 2015)). In addition, *Phgdh*  
137 mRNA expression also increases in terminally differentiated pig muscles when hypertrophy is stimulated with the  
138  $\beta$ 2-agonist ractopamine (Brown et al., 2016). Together, this shows that PHGDH becomes activated and/or more  
139 abundant in proliferating cells and in at least one type of skeletal muscle hypertrophy.

140

141 Currently, it is unclear whether a hypertrophying muscle reprograms its metabolism similar to cancer cells so that  
142 glycolytic intermediates and other metabolites are shunted out of energy metabolism into anabolic reactions such  
143 as serine biosynthesis and one-carbon metabolism. The aim of this study was therefore to investigate whether  
144 hypertrophying C2C12 myotubes shunt more carbon from glucose into amino acid and nucleotides for protein and  
145 RNA synthesis. We also investigated whether inhibition of glycolytic flux and *Phgdh* knockdown or  
146 overexpression affected C2C12 myotube size, in untreated or IGF-1-treated myotubes. We found that  
147 hypertrophying C2C12 and primary mouse myotubes indeed shunt more carbon from glucose into protein and  
148 RNA synthesis, that the inhibition of glycolysis and knockdown of *Phgdh* reduces myotube size whereas  
149 overexpression of *Phgdh* increases myotube size, respectively. Collectively, this suggests that glycolysis is  
150 important for hypertrophying C2C12 myotubes which reprogram their metabolism similar to cancer.

151

152

## 153 **2. Materials and methods**

### 154 **2.1 C2C12 cell culture**

155 C2C12 muscle cells (ATCC, Cat# CRL-1772, RRID:CVCL\_0188; Middlesex, UK; cells are regularly tested for  
156 contamination) were grown to confluency in growth medium containing Dulbecco's Modified Eagle's Medium  
157 DMEM (Gibco, Cat#31885, Waltham, MA, USA), containing 10% fetal bovine serum (Biowest, Cat#S181B,  
158 Nuaille, France), 1% penicillin/streptomycin (Gibco, Cat#15140, Waltham, MA, USA) and 0.5% amphotericin B  
159 (Gibco, Cat#15290-026, Waltham, MA, USA) and incubated at 37°C in humidified air with 5% CO<sub>2</sub>. Once 90%  
160 confluent, medium was changed to differentiation medium consisting of DMEM supplemented with 2% horse  
161 serum (HyClone, Cat#10407223, Marlborough, MA, USA) and 1% penicillin/streptomycin. This medium was  
162 refreshed daily for 3 days until treatment.

163

### 164 **2.2 Primary myoblast culture**

165 Primary muscle stem cells were obtained from extensor digitorum longus (EDL) muscles of 6-week to 4-month  
166 old mice of a C57BL/6 background. The experiments were conducted with post-mortem material from surplus  
167 mice (C57BL/6J) originating from breeding excess that had to be terminated in the animal facility, and therefore,  
168 these animals do not fall under the Netherlands Law on Animal Research in agreement with the Directive  
169 2010/63/EU. The EDL muscles were incubated in collagenase type I (Sigma-Aldrich, Cat#C0130, Saint Louis,  
170 MO, USA) at 37 °C, in air with 5% CO<sub>2</sub> for 2 h. The muscles were washed in DMEM, containing 1%  
171 penicillin/streptomycin (Gibco, Cat#15140, Waltham, MA, USA) and incubated in 5% Bovine serum albumin  
172 (BSA)-coated dishes containing DMEM for 30 min at 37 °C in air with 5% CO<sub>2</sub> to inactivate collagenase. Single  
173 muscle fibres were separated by gently blowing with a blunt ended sterilized Pasteur pipette. Subsequently, muscle  
174 fibres were seeded in a thin layer matrigel (VWR, Cat#734-0269, Radnor, PA, USA)-coated 6-well plate  
175 containing DMEM growth medium, 1% penicillin/streptomycin (Gibco, 15140, Waltham, MA, USA), 10% horse  
176 serum (HyClone, Cat#10407223, Marlborough, MA, USA), 30% fetal bovine serum (Biowest, Cat#S181B,  
177 Nuaille, France), 2.5ng ml<sup>-1</sup> recombinant human fibroblast growth factor (rhFGF) (Promega, Cat#G5071,  
178 Madison, WI, USA), and 1% chicken embryonic extract (Seralab, Cat#CE-650-J, Huissen, The Netherlands).  
179 Primary myoblasts were allowed to proliferate and migrate off the muscle fibres for 3-4 days at 37 °C in air with  
180 5% CO<sub>2</sub>. After gentle removal of the muscle fibres, myoblasts were cultured in matrigel-coated flasks until passage  
181 5. Cells were pre-plated in an uncoated flask for 15 min with each passage to reduce the number of fibroblasts in

182 culture. Cell population was 99% Pax7<sup>+</sup>. All experiments with primary myoblasts were performed on matrigel-  
183 coated plates. Primary myoblasts were cultured in differentiation medium to differentiate for 2 days until treatment.

184

## 185 **2.3 Cell treatments**

### 186 *2.3.1 <sup>14</sup>C-glucose to protein/RNA flux analysis*

187 After 48 h in differentiation medium, myotubes were incubated in differentiation medium plus treatment for up to  
188 48 h. Treatments were one of: vehicle control (0.00001% bovine serum albumin; BSA), IGF-1 (100 ng ml<sup>-1</sup>;  
189 recombinant Human IGF-1, Peptotech, Cat#100-11, London, UK, rapamycin (100 ng ml<sup>-1</sup>; Calbiochem,  
190 Cat#553210, Watford, Hertfordshire, UK) and IGF-1 + rapamycin.

191

### 192 *2.3.2 Inhibition of glycolysis via 2-deoxyglucose (2DG)*

193 Differentiated C2C12 myotubes were treated with IGF-1, 2DG or both. IGF-1 (100 ng ml<sup>-1</sup>) and 2DG (5 mM,  
194 Cat#D6134, Sigma Aldrich) were diluted in differentiation medium. On day 3, IGF-1 and 2DG were added to the  
195 myotube culture for 24 hours. For inhibition of AKT, we used the compound MK-2206 (10-1000 μM, Bio-  
196 Connect, Cat#HY-10358, Netherlands). Differentiation medium was refreshed daily for 4 days. On day 7,  
197 myotubes were treated with MK-2206 (1000 μM). After 1 h incubation with MK-2206 (10 μM, 100 μM or 1000  
198 μM), IGF-1 (100 ng ml<sup>-1</sup>) was added. Cells were harvested on day 8, after 24 h of IGF-1 treatment.

199

## 200 **2.4 Protein determination**

201 Cells were lysed on ice in 500 μl of radioimmunoprecipitation assay (RIPA) buffer (Sigma-Aldrich, R0278, Saint  
202 Louis, MO, USA) supplemented with phosphatase (1:250, Sigma-Aldrich, 04906837001, Saint Louis, MO, USA)  
203 and proteinase (1:50, Sigma-Aldrich, Cat#11836153001, Saint Louis, MO, USA) inhibitor cocktails, 0.5 M  
204 Ethylenediaminetetraacetic acid (EDTA; 1:500), sodium fluoride (NaF; 1:50) and sodium orthovanadate (1:50).  
205 Lysates were left on ice for 15 min and cellular debris removed by centrifuging at 13,000 rpm for 15 min, at 4°C.  
206 Supernatants were then transferred into fresh Eppendorfs and frozen at -80°C (for radiolabeled glucose to protein)  
207 or their protein concentrations calculated (Western blot) using a Pierce BCA Protein Assay kit (Thermo Scientific,  
208 Cat#23225, Waltham, MA, USA).

209

## 210 **2.5 RNA isolation**

211 After washing cells with Phosphate-Buffered Saline (PBS). Cells were lysed in TRI reagent (Invitrogen, 11312940,  
212 Carlsbad, CA, USA) and stored at -80°C. RNA was isolated using RiboPureTMkit (Applied Biosystems, Foster

213 City, CA, USA) and converted to cDNA with high-capacity RNA to cDNA master mix (Applied Biosystems,  
214 Foster City, CA, USA). cDNA was diluted 10x and stored at -20°C.

215

## 216 **2.6 <sup>14</sup>C-glucose to protein flux analysis**

217 1 µl ml<sup>-1</sup> of 0.1 mCi ml<sup>-1</sup> <sup>14</sup>C glucose (PerkinElmer, Cat# NEC042V250UC, Waltham, MA, USA) was added to  
218 differentiation medium 48 h before the end of the experiments. 200 µl of medium was maintained and added to 4  
219 ml of scintillation fluid to acquire initial radioactivity readings for rate of incorporation calculations. To separate  
220 protein from other macromolecules, harvested lysates of 48 h treated cells were fractionated by acetone  
221 precipitation. The protein pellet was then re-suspended in PBS and incubated in 4 mL of scintillation fluid (Insta-  
222 Gel Plus, PerkinElmer) for 24 h (to homogenize the samples) before measuring the radioactivity in a scintillation  
223 counter. Results are given in counts per minute (CPM) per 10 cm diameter Petri dish.

224

## 225 **2.7 Gel-phosphorimaging**

226 Protein was extracted as described in the section “Protein determination”. Samples were prepared and  
227 electrophoresed as described in the section ‘Western Blotting’. The 12% Criterion XT pre-cast Bis-Tris gel (Bio-  
228 rad, Cat# 3450119, Hemel Hempstead, UK) was then stained with Silver Stain (Bio-rad, Cat#1610481, Hemel  
229 Hempstead, UK) and imaged as a loading control quality check. The gel was then dried using a gel dryer and  
230 incubated with an imaging plate inside a radiography cassette. After 48 h the imaging plate was imaged using a  
231 phosphor-imager (Fuji FLA3000).

232

## 233 **2.8 <sup>14</sup>C-glucose to RNA flux analysis**

234 After the 48 h incubation with 1 µl ml<sup>-1</sup> of 0.1 mCi ml<sup>-1</sup> <sup>14</sup>C glucose and reagents, RNA was extracted using an  
235 RNeasy Mini Kit (Qiagen, Cat#74104, Valencia, CA, USA) according to the manufacturer’s instructions. The  
236 elution was then placed in 4 ml of scintillation fluid for 24 h prior to measuring radioactivity of the samples in a  
237 scintillation counter.

238

## 239 **2.9 Western blotting**

240 Respective volumes of lysate were diluted in 5 times Laemmli SDS buffer and denatured for 5 min at 95°C, prior  
241 to western blotting. Samples were then electrophoresed on 12% Bis-Tris gels (Bio-rad, Cat#3450125, Hemel  
242 Hempstead, UK) and transferred onto PVDF membranes (GE Healthcare, Cat#15269894, Chicago, IL, USA) using  
243 a semi-dry transfer blotter (Bio-rad). Membranes were blocked in prime blocking agent (GE Healthcare,

244 Cat#RPN418, Chicago, IL, USA), then incubated with primary Phospho-P70S6K (Thr389; 1:2000; Cell Signaling  
245 Technology, Cat# 9234, Leiden, The Netherlands, RRID:AB\_2269803), Phospho-AKT Ser473 (1:2000; Cell  
246 Signaling Technology, Cat# 4060, Leiden, The Netherlands, RRID:AB\_2315049),  $\alpha$ -TUBULIN (1:10000; Cell  
247 Signaling Technology, Cat# 2125, Leiden, The Netherlands, RRID:AB\_2619646), pan-ACTIN (1:1000, Cell  
248 Signaling Technology, Cat# 8456, Leiden, The Netherlands, RRID:AB\_10998774), PHGDH (1:1000; Cell  
249 Signaling Technology, Cat# 13428, Leiden, The Netherlands, RRID:AB\_2750870), Phospho-AMPK (Thr172,  
250 1:500, Cell Signaling Technology, Cat# 2531, Leiden, The Netherlands, RRID:AB\_330330), and anti-  
251 rabbit/mouse IgG secondary antibody (1:2000; Roche, Cat#12015218001, Basal, Switzerland) prior to fluorescent  
252 imaging. Densities of the bands from blot images were normalized loading control by densitometric analysis using  
253 ImageJ software (RRID:SCR\_003070).

254

## 255 **2.10 Myotube size measurement**

256 Four photographs of each well were taken at 10x magnification after the 24 h treatment. Diameters were measured  
257 in 20-50 myotubes at 5 equidistant locations along the length of the cell using ImageJ (<http://rsbweb.nih.gov/ij/>,  
258 National Institutes of Health, Bethesda, MD, USA; RRID:SCR\_003070) and taking into account the pixel-to-  
259 aspect ratio.

260

## 261 **2.11 Lactate concentration**

262 Lactate levels in the culture medium were measured using Lactate Assay Kit (Sigma-Aldrich, Cat#MAK064, Saint  
263 Louis, MO, USA) according to manufacturer's instructions. Culture medium samples were directly deproteinized  
264 with a 10 kDA MWCO spin filter to ensure lactate dehydrogenase was separated from the medium. Samples (0.5  
265  $\mu$ L) were assayed in duplicate on a 96 well plate. Lactate Assay Buffer was added to bring samples to a final  
266 volume of 50  $\mu$ L/well. Lactate levels were determined by colorimetric assay on 570 nm and concentrations were  
267 based on the standard curve.

268

## 269 **2.12 Real-time quantitative PCR**

270 cDNA was analysed using real-time quantitative PCR (see Table 1 for primer details). Experiments were  
271 conducted in duplicates. Concentration of the transcriptional target was detected with fluorescent SYBR Green  
272 Master Mix (Fischer Scientific, Cat#10556555, Pittsburgh, PA, USA). Transcriptional expressions of the target  
273 genes were referenced to 18S housekeeping gene. Relative changes in gene expression were determined with the  
274  $\Delta$ Ct method.

275 **Table 1.** PCR primers

| Gene                  | Forward               | Reverse               |
|-----------------------|-----------------------|-----------------------|
| 18S rRNA              | GTAACCCGTTGAACCCCAT   | CCATCCAATCGGTAGTAGCG  |
| <i>Phgdh</i>          | CCCCTATGATTGGCCTCCT   | AGACACCATGGAGTTTGGT   |
| <i>Trim63</i> (Murfl) | GGGCTACCTTCTCTCAAGTGC | CGTCCAGAGCGTGTCTCACTC |
| <i>Fbxo32</i> (Mafbx) | AGACTGGACTTCTCGACTGC  | TCAGCTCCAACAGCCTTACT  |

276

277 **2.13 siRNA-mediated knockdown of *Phgdh***

278 To carry out a PHGDH loss-of-function experiment, we knocked down *Phgdh* in C2C12 and primary myotubes  
 279 using silencer RNA (Ambion, Carlsbad, CA, USA, see Table 2 for siRNA sequences). C2C12 myoblasts or  
 280 primary myoblasts were grown and differentiated as described. On day 6, myotubes were transfected with siRNA  
 281 targeted against *Phgdh* using the liposome-mediated method (Lipofectamine RNAiMAX, Invitrogen, Cat#  
 282 13778100, Carlsbad, CA, USA). As a negative control, a non-targeting silence RNA sequence (siControl) was  
 283 used. siRNA was diluted in Opti-MEM medium and incubated for 5-10 minutes with Lipofectamine mixture.  
 284 RNA-lipofectamine complexes with a final concentration of 20 nM were added to each well. On day 7, the  
 285 differentiated myotubes were treated with IGF-1 (100 ng ml<sup>-1</sup>) and harvested at day 8 (48 hours post-transfection).

286 **Table 2.** siRNA information

| Silenced gene | Forward               | Reverse               |
|---------------|-----------------------|-----------------------|
| <i>Phgdh</i>  | CCCGAAUGCAAUCCUUUGGTT | CCAAAGGAUUGCAUUCGGGTG |
| Control       | AGUACUGCUUACGAUACGGTT | CCGUAUCGUAAGCAGUACUTT |

287

288 **2.14 PHGDH plasmid cloning, retrovirus and retroviral infection**

289 To carry out a PHGDH gain-of-function experiment, we subcloned a human PHGDH pMSCV retroviral vector  
 290 and transduced C2C12 myoblasts with this vector prior to differentiation. Human PHGDH cDNA (transcript  
 291 variant NM\_006623.4, which encodes a protein of 533 amino acids) was amplified by RT-PCR and cloned  
 292 into pMSCV-IRES-eGFP using In-Fusion® HD Cloning Kit User Manual (Takara, Cat#638920, Shiga, Japan)  
 293 following the manufacturer's instructions (see Table 3 for primer sequences).

294 **Table 3.** Primers

| Gene         | Forward                 | Reverse                         |
|--------------|-------------------------|---------------------------------|
| <i>PHGDH</i> | CGCCGGAATTAGATCTATGGCTT | GGAAGGTCAAGGTGAAGATTGAGCTCATATA |
|              | TTGCAAATCTGCG           | CAATT                           |

295

296 For retroviral particle production, HEK293T cells were seeded at a density of 3 x 10<sup>6</sup> cells per T75 flask, 24 h prior  
 297 to transfection. 1 h before transfection, medium was changed to 7 ml of fresh growth medium, DMEM Glutamax

298 (Gibco, Cat#10566016, Waltham, MA, USA) + 10% FBS (Biowest, Cat#S181B, Nuaille, France). For  
299 transfection, 4 µg of PHGDH plasmid or 4 µg of empty vector plasmid (Addgene, plasmid #52107) was mixed  
300 with 4 µg of DNA RV helper plasmid (Addgene, plasmid #12371), in 1800 µl of Opti-MEM reduced serum  
301 medium (ThermoFisher, Cat# 31985070, Waltham, MA, USA). 6 µl of Lipofectamine Plus reagent was then added  
302 and incubated for 5 min at room temperature, followed by 24 µl of Lipofectamine LTX (ThermoFisher,  
303 Cat#15338100, Waltham, MA, USA) for a further 30 min incubation at room temperature. Medium was changed  
304 6 and 24 h after transfection, 48 h post transfection, medium was changed to 7 ml of fresh growth medium.  
305 Retroviral particles were collected 12, 24 and 36 h after the last medium change by collecting all 7 ml of medium,  
306 and filtrating through 0.45 µm filters.  
307 For retroviral infection,  $3 \times 10^4$  C2C12 cells were seeded in a 6-well plate overnight at 37°C in a 5% CO<sub>2</sub> incubator.  
308 1 h prior to infection, medium was changed to 1.5 ml of fresh growth medium and cells were infected by adding  
309 retroviral particles in a ratio of 1:4. Cells were incubated until reaching 90% confluence and then differentiated as  
310 described.

311

## 312 **2.15 Statistical analysis**

313 Shapiro–Wilk tests were used to test for normal distribution. Data were then analysed using unpaired t-test, two-  
314 way analysis of variance (ANOVA), or three-way ANOVA for normally distributed data. When data was not  
315 normally distributed, we used the Mann-Whitney U test. In the case of a significant ANOVA effect, a Bonferroni  
316 test was used to determine significant differences between conditions. Significance was set at  $p < 0.05$ . Data are  
317 presented as mean ± SEM with individual data points. Statistical analyses were performed using Prism 7.0  
318 (GraphPad Prism, RRID:SCR\_002798).

319



## 320 **3 Results**

### 321 **3.1 IGF-1 induced myotube growth increases 14C-incorporation into protein and RNA**

322 A key feature of metabolic reprogramming in cancer is that glycolytic intermediates and other metabolites are  
323 shunted out of energy metabolism and into anabolic pathways (DeBerardinis and Chandel, 2016). In relation to  
324 skeletal muscle hypertrophy, a key question is: does a similar shunting of metabolites happen in hypertrophying  
325 muscles? To try to answer this question, we stimulated hypertrophy of C2C12 myotubes with 100 ng ml<sup>-1</sup> of IGF-  
326 1 (Rommel et al., 2001) and measured the rate by which 14C derived from 14C-glucose is incorporated into amino  
327 acid→protein and nucleotide→RNA synthesis (Figure 1a). This experiment revealed that 14C-incorporation both  
328 into protein and RNA was already measurable at baseline and that IGF-1 increased 14C-incorporation into protein  
329 by ≈71%, on average, versus control (12924 ± 2113 versus 7581 ± 1586 CPM) (Figure 1c). Generally, little 14C  
330 was incorporated into RNA and whilst IGF-1 increased 14C incorporation into RNA (two-way ANOVA, *p*=0.030),  
331 this was only a non-significant trend (Bonferonni post-hoc) (Figure 1d). Additional treatment with the mTOR-  
332 inhibitor rapamycin reduced IGF-1-stimulated 14C incorporation into protein by ≈61% when compared to control,  
333 and ≈77% when compared to IGF-1 stimulation, which suggests that the 14C incorporation into protein is  
334 mTORC1 dependent. Together this data indicates that C2C12 myotube hypertrophy is associated with an increased  
335 shunting of carbon from glucose into anabolic reactions, such as incorporation of amino acid into proteins.

a)

**Experimental strategy**

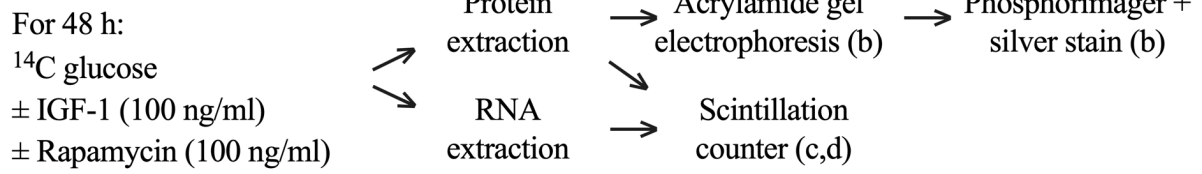

b)

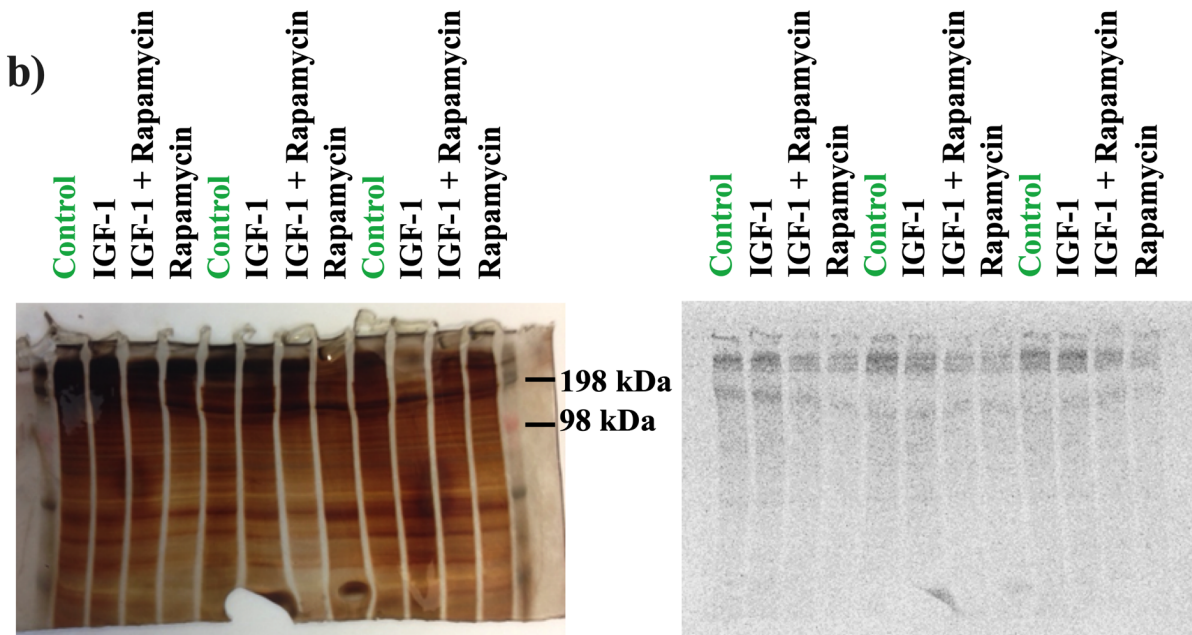

c)

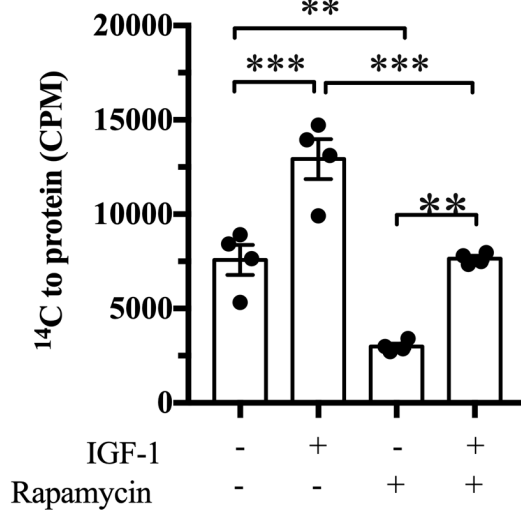

d)

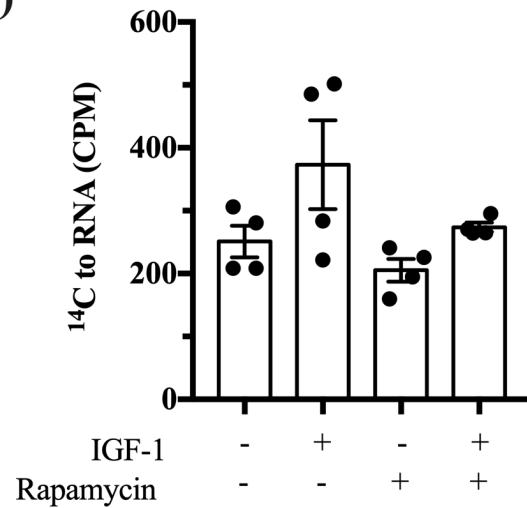

336

337 **Figure 1.** Glucose-derived ( $^{14}\text{C}$ ) carbon can be converted into protein and RNA particularly in IGF-1 hypertrophy  
 338 stimulated myotubes, suggesting cancer-like metabolic reprogramming so that energy metabolites are channeled

339 into anabolic pathways. (a) Schematic depiction of the experimental strategy. (b) Dried gels showing all protein  
340 bands and radioactivity detected in the gel using a phospho-imager (n=3 samples per treatment on one gel). (c,d)  
341 Quantification of radioactivity (n=4 samples per treatment; in counts per minute; CPM) per 10 cm diameter dish  
342 in (c) precipitated and isolated protein lysates and (d) extracted RNA (n=4). \*Significantly different between  
343 indicated conditions, two-way ANOVA with Bonferonni post-hoc test ( $p<0.05$ ).

344

### 345 **3.2 Blocking glycolysis inhibits myotube growth**

346 Because glycolysis is not only a key metabolic pathway but also a feeder pathway for anabolic reactions  
347 (DeBerardinis and Chandel, 2016), we tested whether an inhibition of glycolysis affected C2C12 myotube size  
348 and hypertrophy. For this purpose, we inhibited glycolysis with 2-deoxy-D-glucose (2DG; Xi et al., 2014) and  
349 then measured the diameter of control myotubes and myotubes stimulated with IGF-1. We found that 2DG  
350 treatment reduced lactate concentrations as expected (Figure 2a) and reduced C2C12 myotube diameter by  $\approx 30\%$ ,  
351 on average, in untreated myotubes and by  $\approx 40\%$  in IGF-1-treated myotubes (Figure 2b,c). Also in primary muscle  
352 cells, myotube size decreased after 2DG exposure (Figure 2d). Collectively, these data suggest that inhibition of  
353 glycolytic flux reduces myotube size.

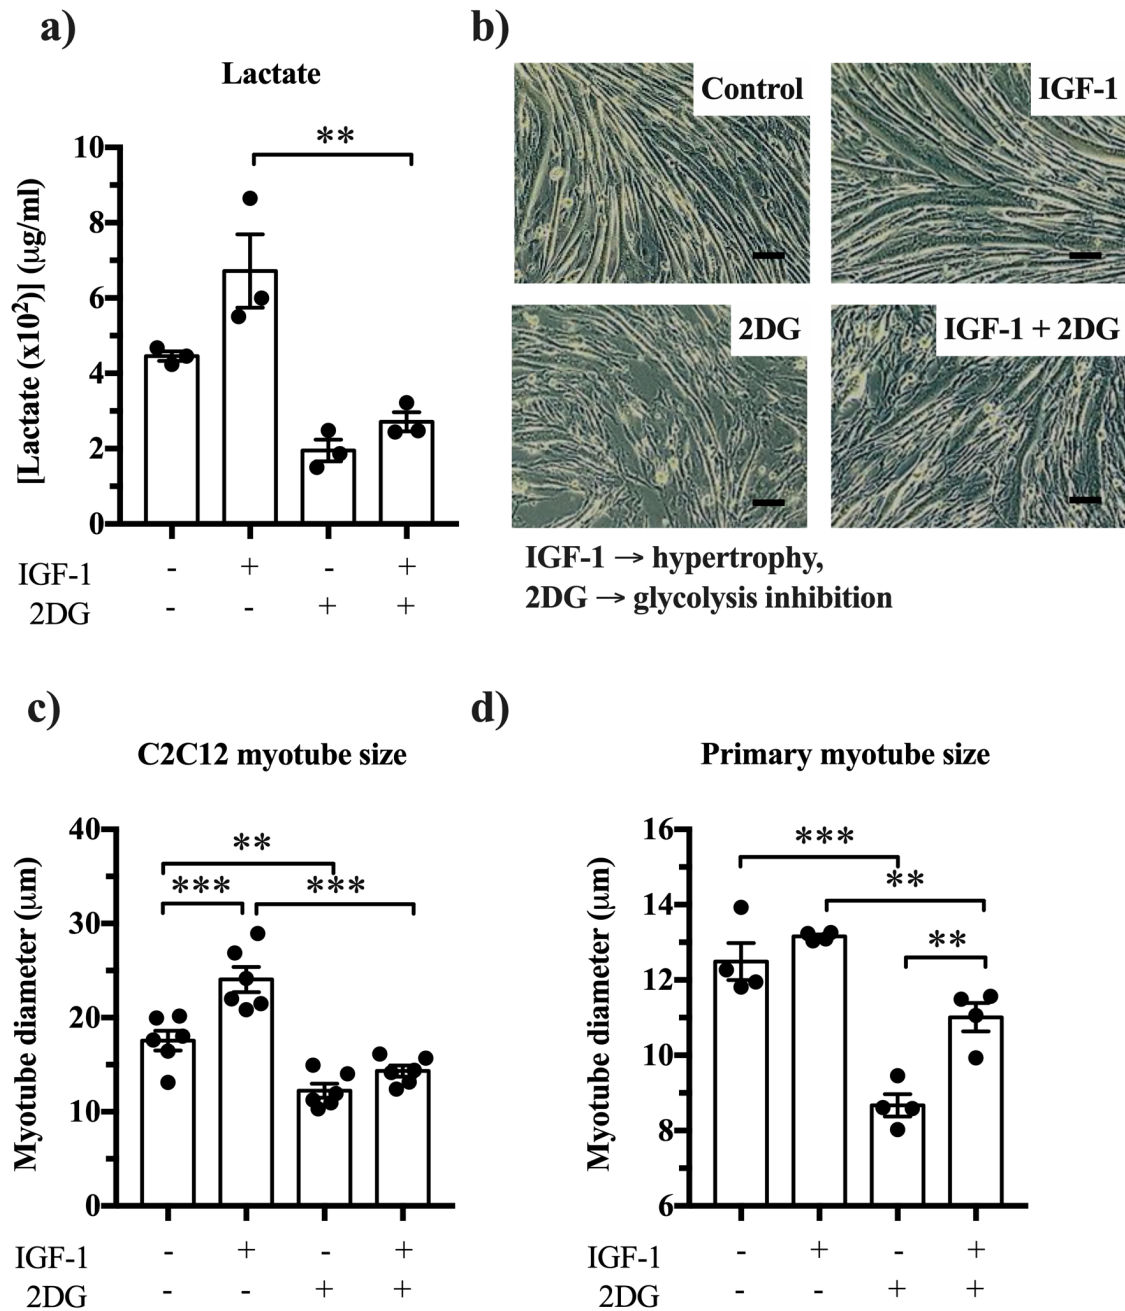

354

355 **Figure 2.** Glycolysis inhibition reduces myotube diameter in C2C12 and primary muscle cells. (a) Effects of 2DG  
 356 on lactate concentrations (n=3), (b,c) C2C12 myotube diameter (n=5) and (d) primary myotubes (n=4). Scale bar  
 357 is 100 µm. \*Significantly different between indicated conditions, unpaired t-test, Mann-Whitney U or two-way  
 358 ANOVA with Bonferonni post-hoc test ( $p < 0.05$ ).

359

360 **3.3 Inhibition of glycolysis and IGF-1 affect protein turnover and PHGDH**

361 The inhibition of glycolytic flux through 2DG may not only affect the generation of glycolytic intermediates as  
362 substrates for anabolic reactions but also energy-sensitive signalling mechanisms. To answer this, we measured  
363 activity markers and the expression, phospho-AMPK and atrophy-associated E3 ubiquitin ligases. We observed no  
364 effect of 2DG on AMPK phosphorylation (Figure 3a; two-way ANOVA,  $p=0.808$ ), indicating that any potential  
365 diminished energy state did not cause the reduced myotube size. On the other hand, we found that 2DG decreases  
366 P70S6K phosphorylation (Figure 3b), repressing protein synthesis. While *Trim63* remains unaffected by blocking  
367 glycolysis (Figure 3e), the other protein degradation marker, *Fbxo32*, is attenuated by 2DG (Figure 3d). Together  
368 this shows that 2DG-associated inhibition of myotube hypertrophy stems from the suppression of both protein  
369 synthesis and protein degradation.

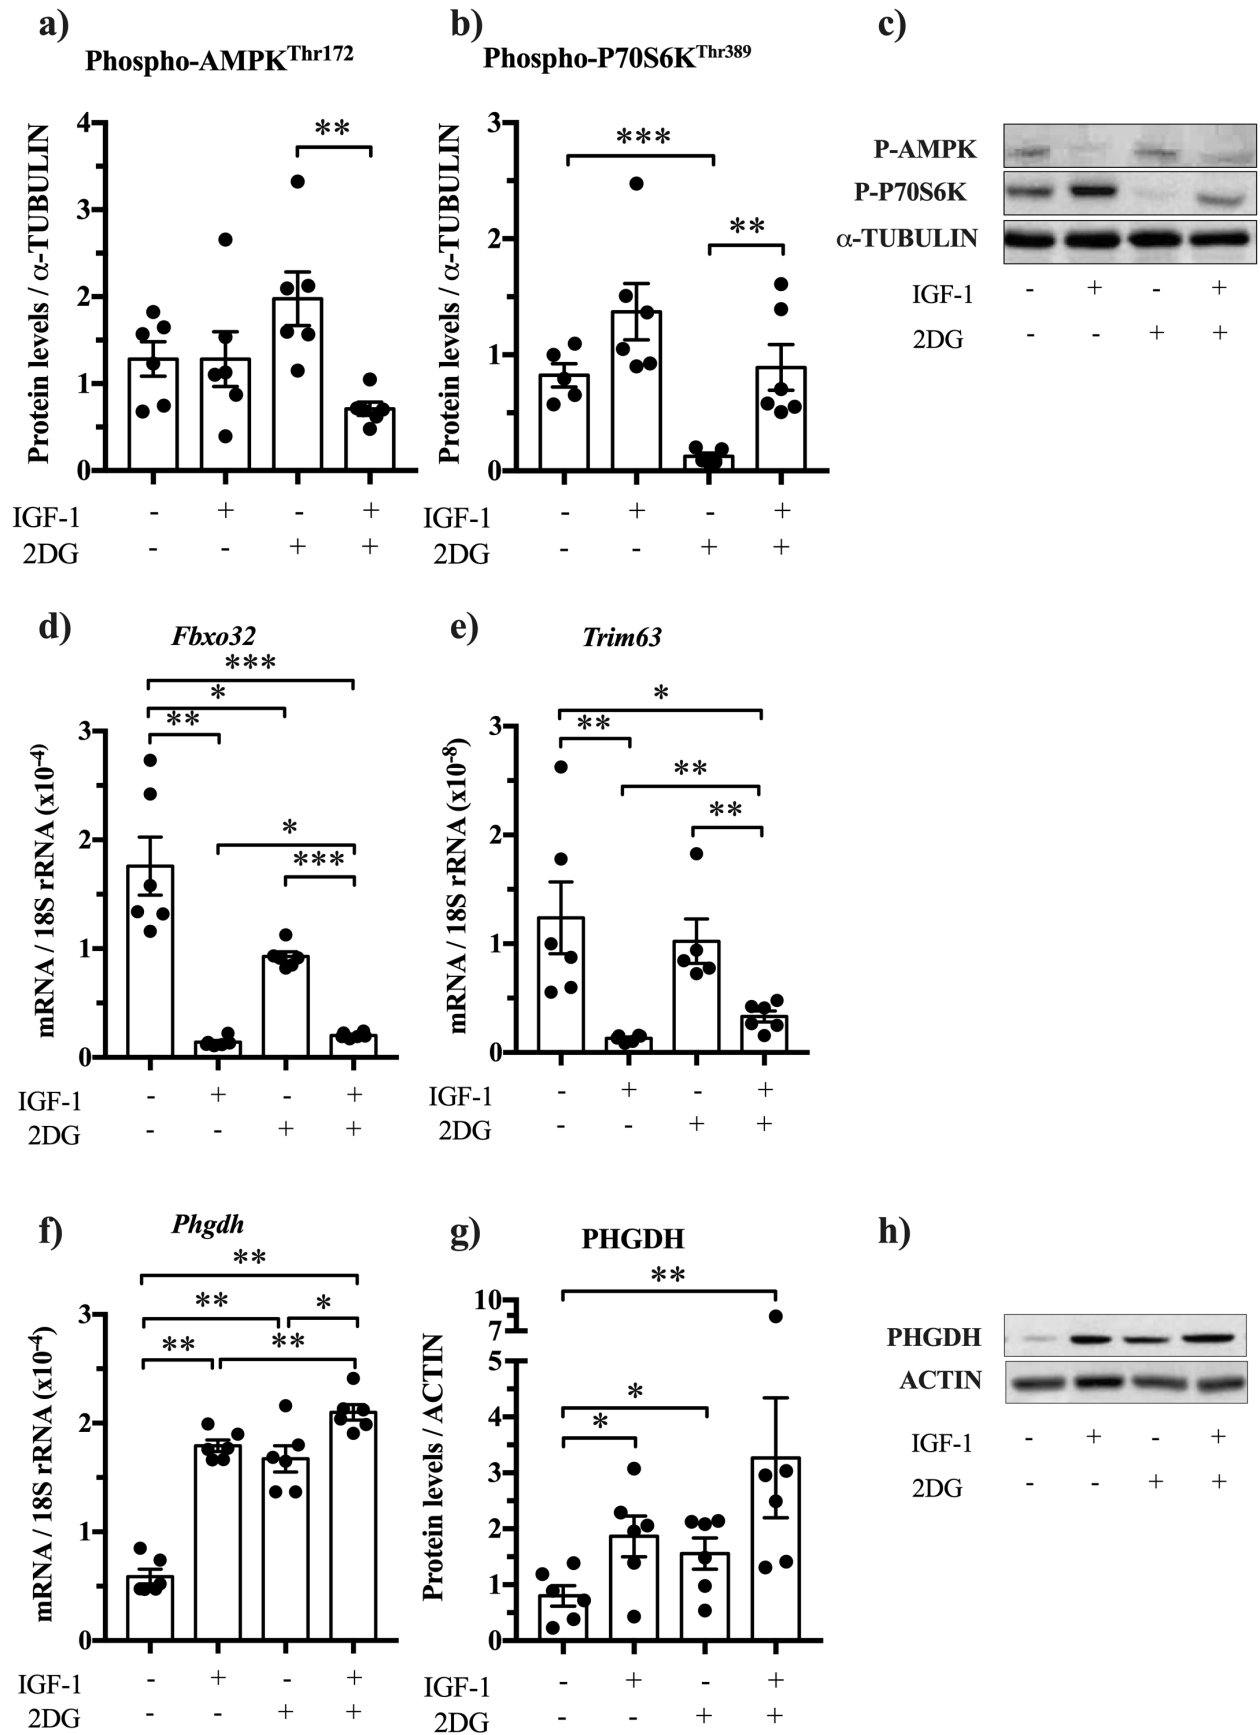

371 **Figure 3.** 2DG affects protein abundance and mRNA expression in myotubes (a) No effect of 2DG on Phospho-  
372 AMPK, but an interaction effect was observed ( $p=0.018$ ) indicating that IGF-1 hampers 2DG-induced AMPK  
373 phosphorylation. (b) P70S6K phosphorylation at residue Thr389 increases upon IGF-1 stimulation ( $p=0.002$ ) and  
374 decreases after 2DG exposure ( $p=0.004$ ). (c) Western blots for Phospho-AMPK and Phospho-P70S6K with  $\alpha$ -  
375 ACTIN as loading control. (d) Mafbx (*Fbxo32*) and (e) Murf1 (*Trim63*) decrease upon IGF-1 stimulation ( $p=0.010$   
376 and  $p<0.001$ , respectively). (f) IGF-1 and 2DG increase *Phgdh* mRNA expression and (g,h) PHGDH abundance  
377 in C2C12 ( $n=6$ ). \*Significantly different between indicated conditions, unpaired t-test, Mann-Whitney U test or  
378 two-way ANOVA with Bonferonni post-hoc test ( $p<0.05$ ).

379

### 380 **3.4 Knock-down of PHGDH attenuates myotube growth**

381 Next we studied the role of the cancer reprogramming-associated enzyme PHGDH. PHGDH catalyses the first  
382 reaction of the serine biosynthesis pathway ( $3\text{-phosphoglycerate} + \text{NAD}^+ \leftrightarrow 3\text{-}$   
383  $\text{phosphooxypyruvate} + \text{H}^+ + \text{NADH}$ ) and is important for one-carbon metabolism (Ducker and Rabinowitz,  
384 2017). PHGDH is well-known to limit cell proliferation (Possemato et al., 2011), but also in post-mitotic growth  
385 it plays a role. Indeed, PHGDH and other serine biosynthesis enzymes are increased when stimulating muscle  
386 hypertrophy in pigs with the  $\beta 2$ -agonist ractopamine (Brown et al., 2016). In agreement, we observed that C2C12  
387 myotubes increase *Phgdh* expression by 204% upon IGF-1 stimulation, and in primary myotubes by 104% (Figure  
388 3f,g). To investigate whether normal levels of PHGDH limit myotube size and hypertrophy, we knocked down  
389 PHGDH through siRNA-mediated RNA interference (Figure 4a-c) and determined the effect on myotube diameter  
390 in C2C12 and primary muscle cells (Figure 4d-g). siRNA interference resulted in a reduction of both *Phgdh*  
391 mRNA, to 30-50% of baseline levels (Figure 4a,g), and protein, non-significantly to  $\approx 16\%$  of baseline levels  
392 (Figure 4b,c). This knockdown of PHGDH decreased C2C12 myotube size under both basal and IGF-1-stimulated  
393 conditions, on average,  $\approx 29\%$  and  $\approx 52\%$ , respectively (Figure 4d,e). Consistently, we observed also in primary-  
394 derived myotubes decreased size upon PHGDH knockdown by 25% and 36% in control and after IGF-1  
395 stimulation, respectively (Figure 4g). Together these results show that a knockdown of PHGDH reduces myotube  
396 size, which further supports the idea that a cancer-like metabolic reprogramming occurs in hypertrophying skeletal  
397 muscle.



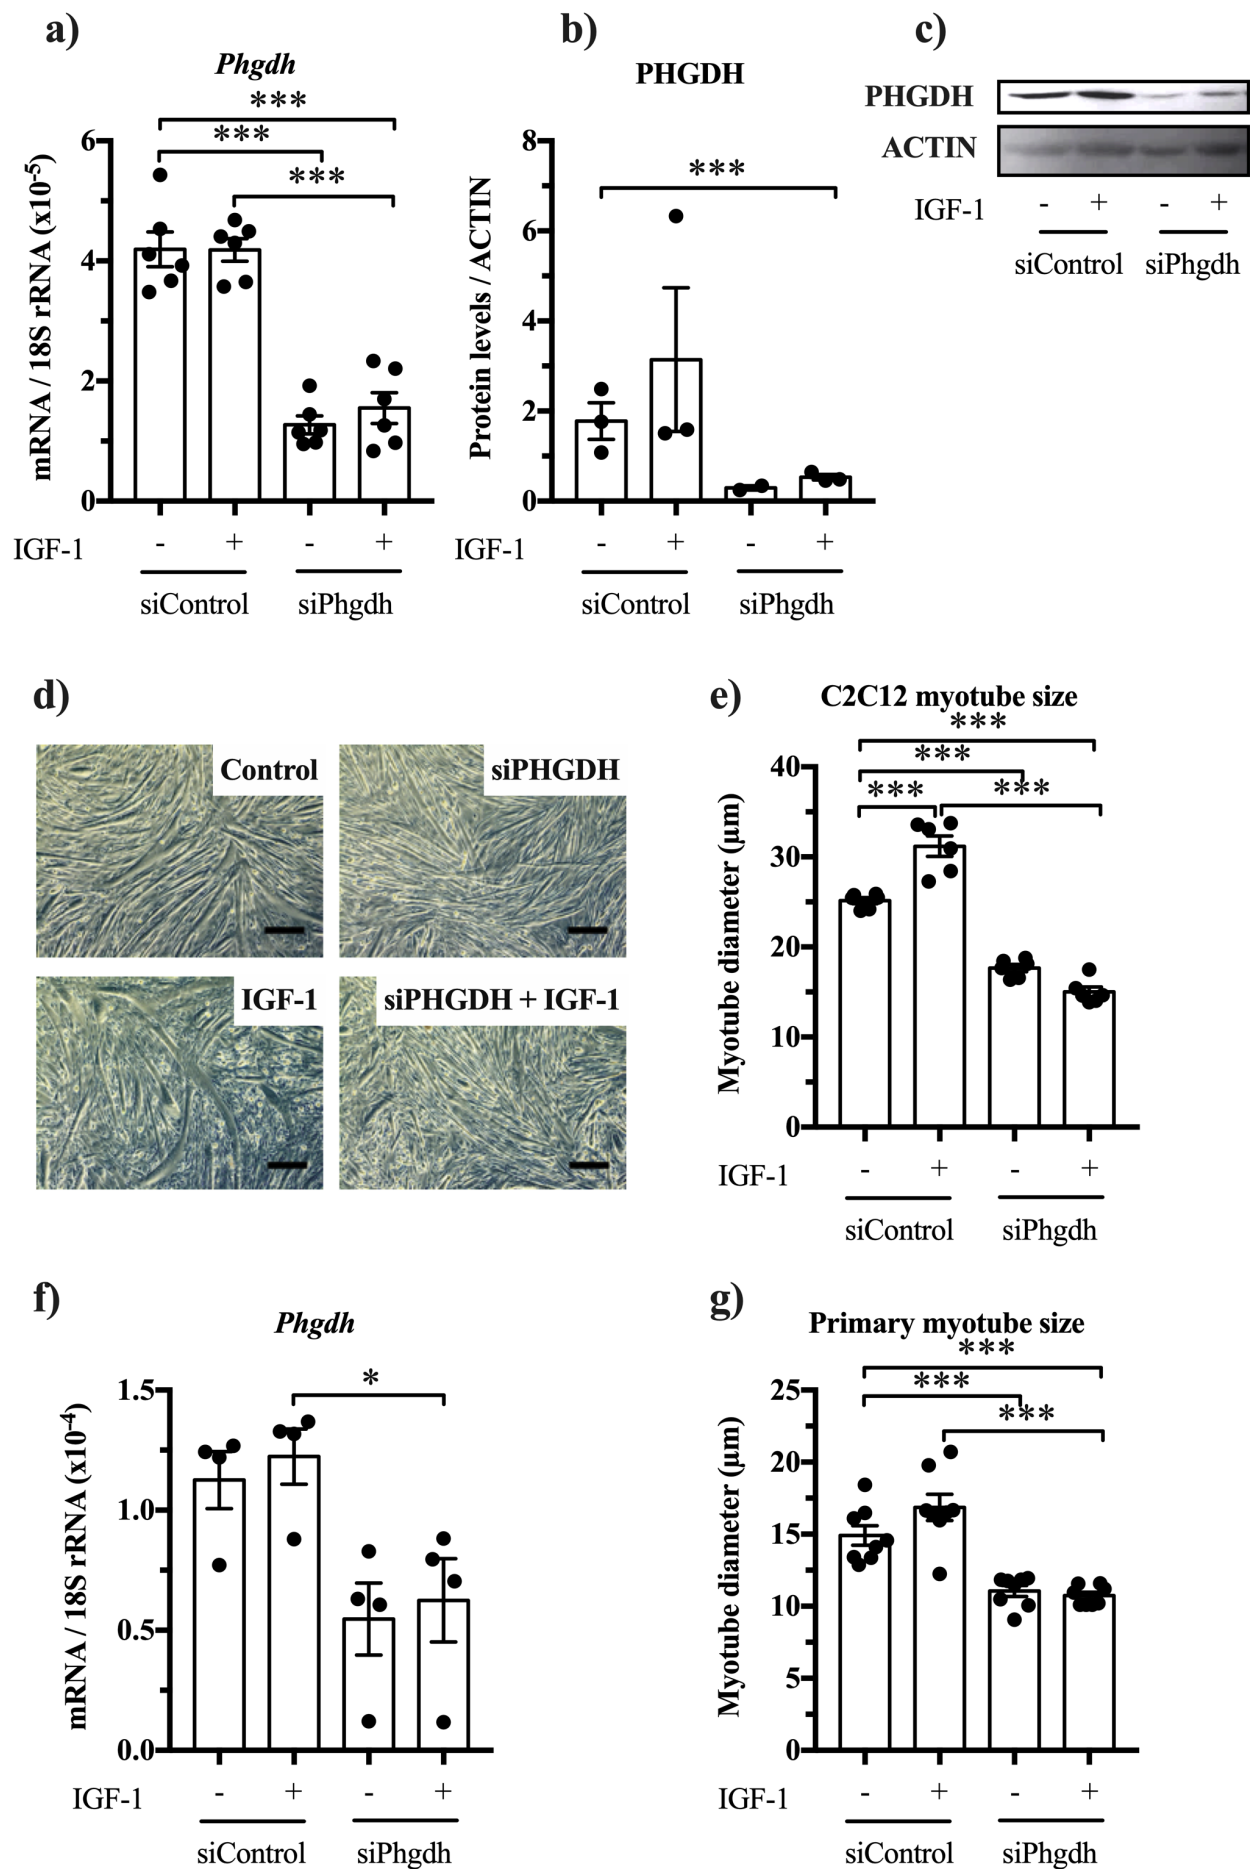



399 **Figure 4.** PHGDH knockdown by siRNA reduces C2C12 myotube size in control and IGF-1-stimulated myotubes.  
400 (a) *Phgdh* mRNA and (b,c) PHGDH protein levels after siRNA treatment. (d) Morphology of C2C12 myotubes,  
401 (e) the effect of PHGDH knockdown on C2C12 myotube diameter (n=6). (f,g) siRNA in primary myotubes  
402 decreased *Phgdh* mRNA and myotube size (n=4-6). Scale bar is 100  $\mu$ m. \*Significantly different between indicated  
403 conditions, unpaired t-test, Mann-Whitney U or two-way ANOVA with Bonferonni post-hoc test ( $p<0.05$ ).

404

### 405 **3.5 PHGDH overexpression increases myotube size**

406 Because a loss of PHGDH reduced myotube size, we next investigated whether a gain of PHGDH would increase  
407 C2C12 myotube size. PHGDH mRNA expression increased after retroviral transduction (Figure 5a) and increased  
408 C2C12 myotube size by  $\approx 20\%$  independent of IGF-1-stimulation (Figure 5b,c). Furthermore, we observed a trend  
409 towards increased myotube size in untreated control cells after PHGDH overexpression compared to empty vector,  
410 which we also saw at 24 h in myotubes that were cultured in absence of IGF-1 (Figure 5b,c).

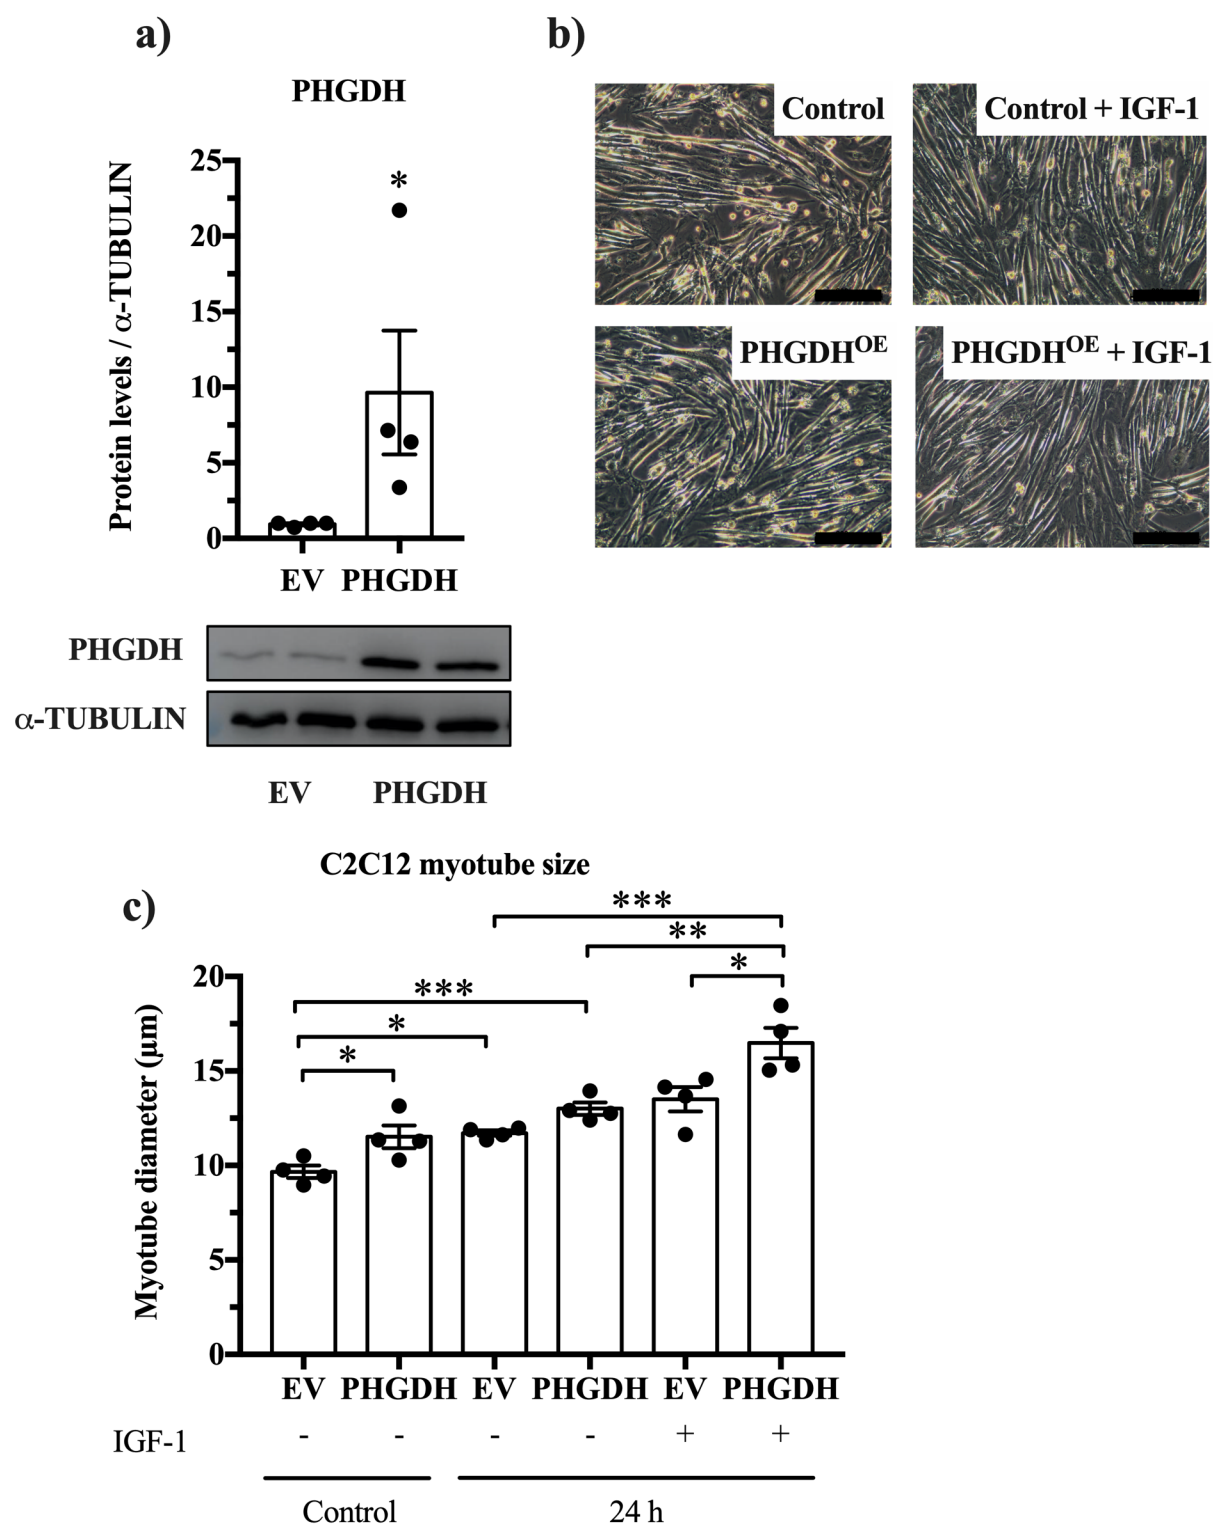

411  
 412 **Figure 5.** Overexpression of PHGDH (PHGDH<sup>OE</sup>) significantly increases PHGDH protein levels and myotube  
 413 size (a) Overexpression of human PHGDH in C2C12 myotubes (n=4). Note that we could not distinguish between  
 414 endogenous mouse PHGDH and overexpressed human PHGDH. (b,c) C2C12 myotube size increases upon  
 415 PHGDH overexpression compared to empty vector (n=4). Scalebar is 200 µm. \*Significantly different between

416 indicated conditions, two-way ANOVA (overexpression x time and overexpression x IGF-1) with Bonferonni  
417 post-hoc test ( $p < 0.05$ ).

418

### 419 **3.6 AKT regulates PHGDH in C2C12 myotubes**

420 Activation of AKT stimulates aerobic glycolysis, i.e. the Warburg effect, in cancer cells (Elstrom et al., 2004),  
421 promotes muscle hypertrophy (Lai et al., 2004) and is associated with a shift towards glycolysis (Izumiya et al.,  
422 2008). We therefore wanted to assess whether AKT also regulates PHGDH e.g. through a change in PHGDH  
423 protein abundance. To study this, we used IGF-1 to activate AKT and stimulate C2C12 hypertrophy, and the AKT  
424 inhibitor, MK-2206, to repress AKT activity and measured Phgdh protein through western blotting. We confirmed  
425 the blocking effect of MK-2206 on activity-associated AKT ( $p = 0.020$ ) (Figure 6a) and P70S6K phosphorylation  
426 (Figure 6b), which was accompanied by reduced myotube diameter (Figure 6c,d). In addition, we found that in  
427 IGF-1-treated C2C12 myotubes, MK-2206 reduced PHGDH abundance in a dose dependent manner (by 42% at  
428 1000  $\mu\text{M}$ ) (Figure 6e,f). This suggests that AKT regulates PHGDH which further supports the idea that a  
429 hypertrophying muscle reprograms its metabolism similar to cancer cells.

430

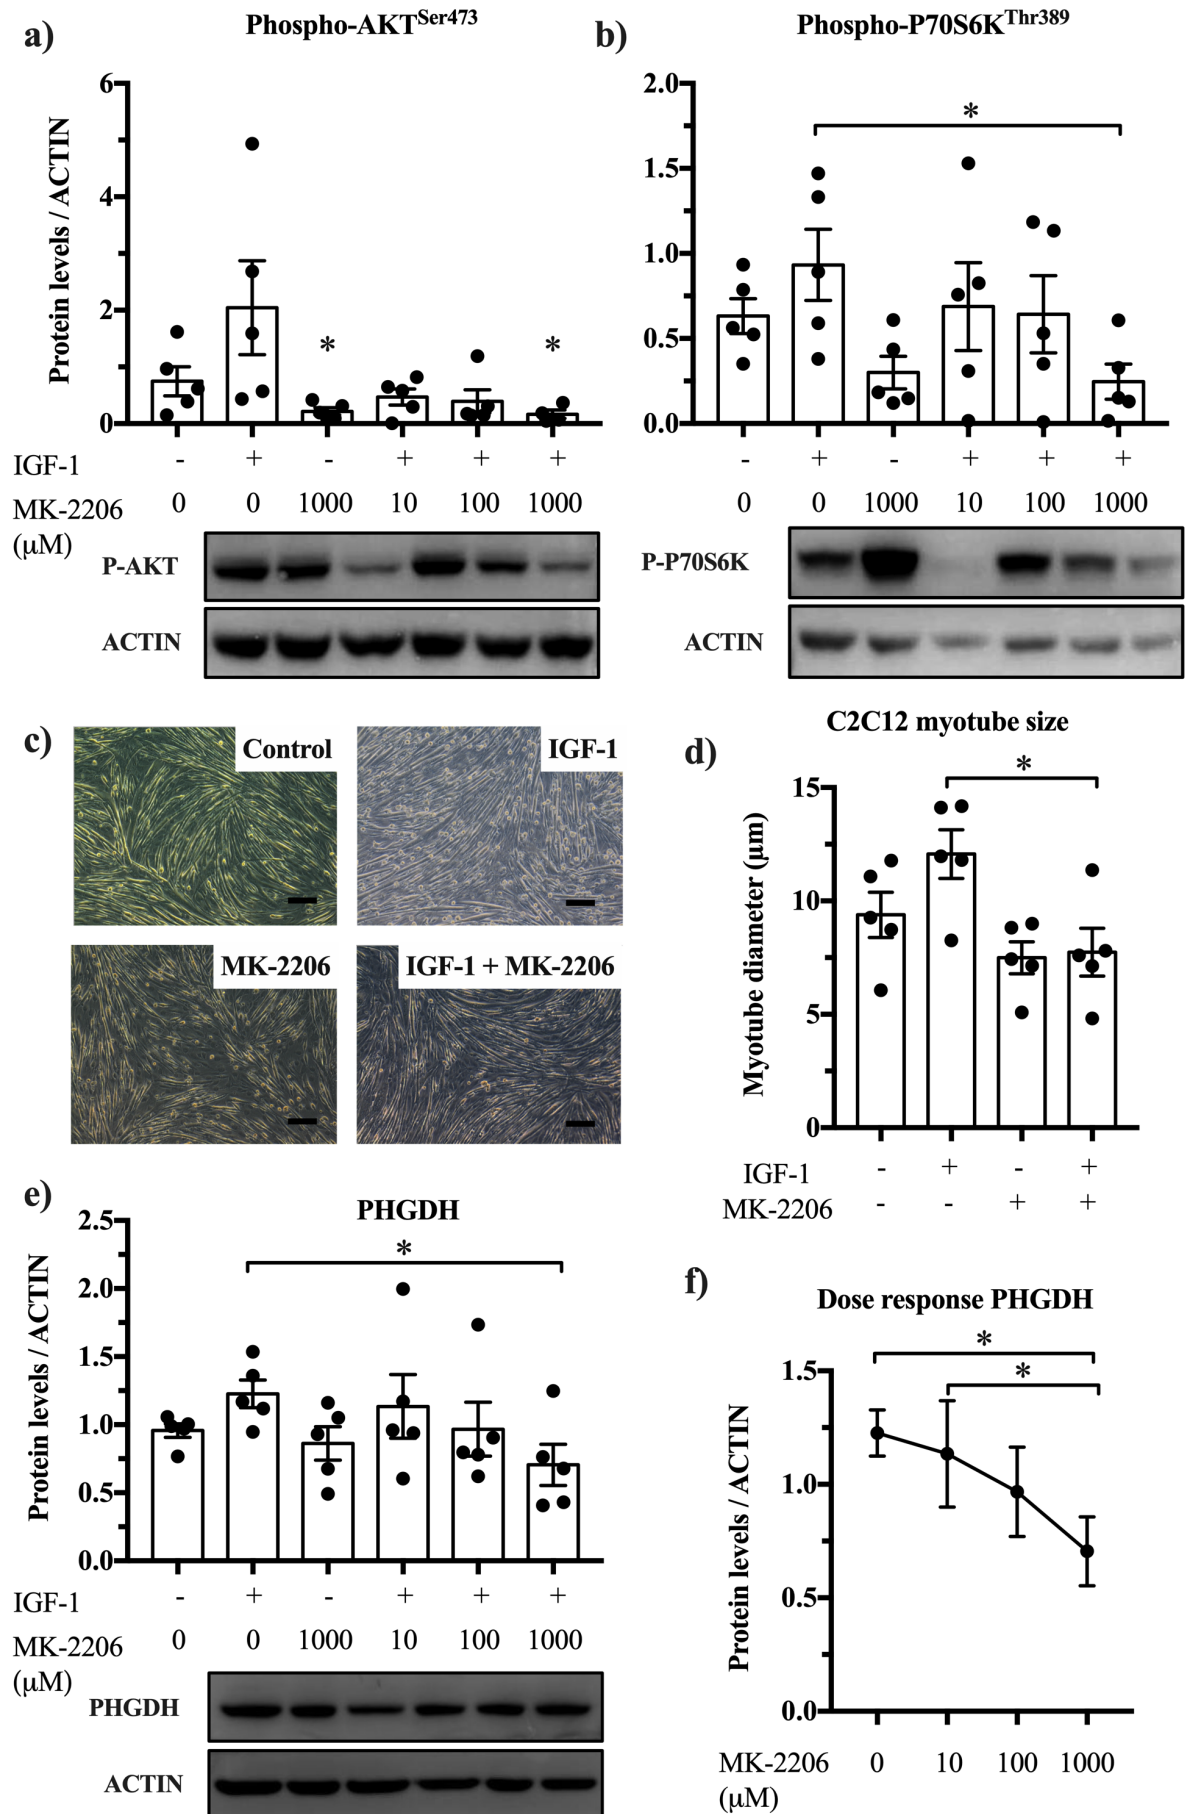

432 **Figure 6.** Blocking AKT prevents IGF-1 induced PHGDH upregulation (a,b) MK-2206 blocks AKT  
433 phosphorylation (two-way ANOVA,  $p=0.020$ ) and P70S6K phosphorylation in untreated and IGF-1 treated  
434 myotubes (n=5). (c,d) The AKT blocker, MK-2206 (1000  $\mu$ M), prevents IGF-1 induced hypertrophy in myotubes  
435 and decreases PHGDH abundance (e,f) in a dose-dependent manner (n=5; Friedman's test). Scale bar is 100  $\mu$ m.  
436 \*Significantly different between indicated conditions, two-way ANOVA (IGF-1 x MK-2206, 1000  $\mu$ M) with  
437 Bonferonni post-hoc test, or Friedman's test ( $p<0.05$ ).  
438

## 439 4 Discussion

440 This study reports five findings that support the idea that hypertrophying muscles reprogram their metabolism  
441 similar to cancer (Figure 7). First, the stimulation of C2C12 myotube hypertrophy through IGF-1 increases  
442 shunting of carbon from glucose especially into amino acid→protein synthesis. Second, we confirm that IGF-1  
443 increases glycolytic flux in C2C12 and primary myotubes (Semsarian et al., 1999) and report that a reduction of  
444 glycolytic flux through 2DG-mediated inhibition lowers myotube size. Third, a reduction of the serine  
445 biosynthesis-catalysing enzyme PHGDH decreases C2C12 and primary myotube size, suggesting that PHGDH  
446 limits normal myotube size and myotube hypertrophy. Fourth, the overexpression of PHGDH in C2C12 myotubes  
447 increases myotube diameter. Fifth, the muscle hypertrophy-promoting kinase AKT regulates the expression of  
448 PHGDH.

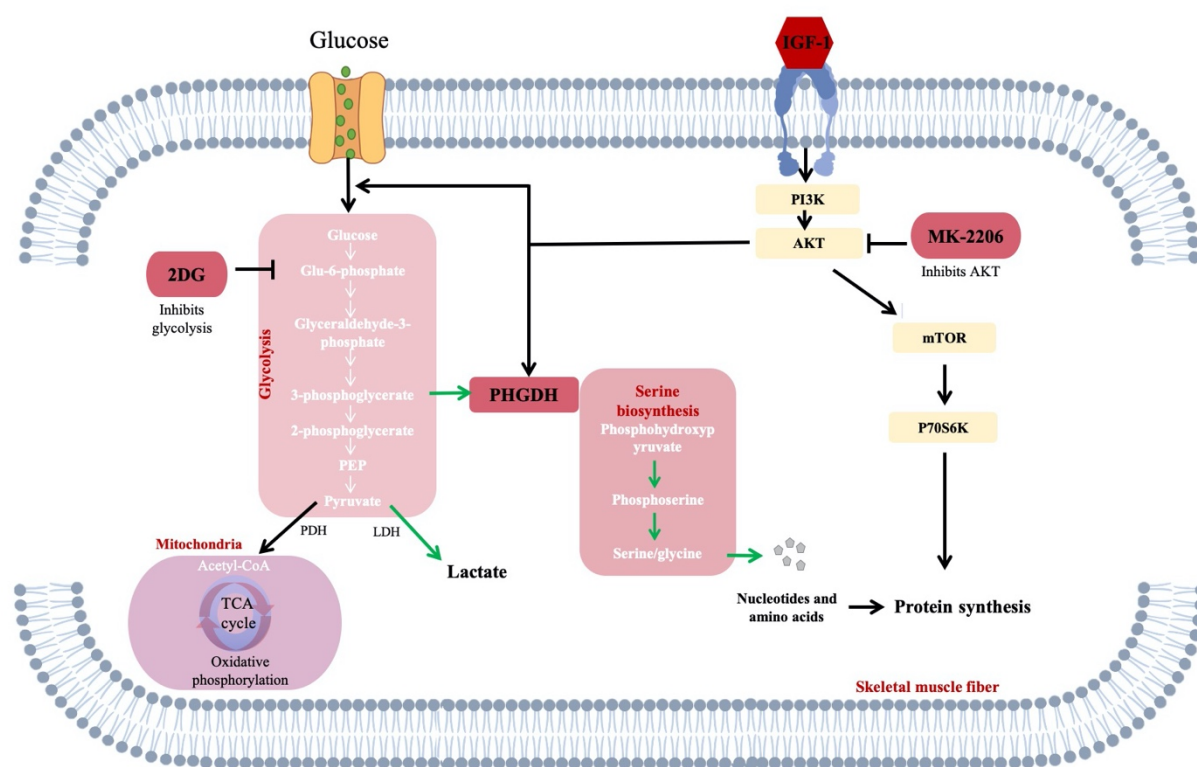

449 **Figure 7.** Glucose is taken up by muscle cells and via several glycolytic intermediates catalyzed to pyruvate for  
450 energy production in mitochondria. Alternatively, cancer-like metabolic remodeling shunts the glycolytic  
451 intermediate 3-phosphoglycerate (3PG) into *de novo* serine synthesis pathway. Phosphoglycerate dehydrogenase  
452 (PHGDH) catalyses the first step of 3PG to 3-phosphohydroxypyruvate which is then converted into 3-  
453 phosphoserine and ultimately serine. Serine is subsequently used for protein synthesis, or as a precursor for  
454

455 nucleotide synthesis. IGF-1 induces hypertrophy in post-mitotic muscle cells, which is abolished by 2DG  
456 administration or siRNA for PHGDH. AKT stimulates glycolysis and promotes hypertrophy through  
457 phosphorylation of P70S6K thereby increasing protein synthesis. Blocking AKT with compound MK-2206  
458 decreases PHGDH abundance and impairs P70S6K phosphorylation which leads to reduced myotube size. Dark  
459 red squares indicate where experimental manipulations were applied in this study. Green arrows denote the  
460 pathway by which glucose and PHGDH can contribute to muscle size. 2DG, 2-deoxyglucose; MK-2206, AKT  
461 blocker.

462  
463 The first conceptual advance of this study is that glucose is not just a substrate for energy metabolism; it also  
464 contributes to cell mass by being a substrate for anabolic reactions both in proliferating C2C12 myoblasts (Hosios  
465 et al., 2016) and in post-mitotic, hypertrophying myotubes (Figure 1). Specifically, we found that carbon derived  
466 from glucose can be incorporated especially into protein, presumably via a glucose → glycolytic intermediates →  
467 amino acid → protein sequence of reactions. This is in line with results reported by Hosios et al., showing that  
468 after 14 days, 6% of the total carbon in C2C12 myotubes was derived from glucose (Hosios et al., 2016). Non-  
469 essential amino acids are indeed synthesized by human tissues including skeletal muscle (Garber et al., 1976), but  
470 it is poorly understood how this is regulated and whether the rate of non-essential amino acid synthesis increases  
471 and limits skeletal muscle hypertrophy. The conversion of glucose into biomass may also contribute to the long-  
472 term glucose uptake post resistance exercise (Fathinul and Lau, 2009; Marcus et al., 2013) and may help to further  
473 explain the beneficial effects of resistance training on metabolic health (Lee et al., 2017).

474  
475 The second finding of this study is that the inhibition of glycolysis reduces C2C12 and primary myotube size  
476 (Figure 2), revealing an association between glycolysis and muscle size. A link between glycolytic flux and growth  
477 was first demonstrated by Otto Warburg, who showed that sarcomas, i.e. fast growing tissues, consumed more  
478 glucose and synthesized more lactate than normal organs in rats (Warburg et al., 1927). In muscle, the stimulation  
479 of muscle hypertrophy in mice through IGF-1 *in vitro* (Semsarian et al., 1999), via gain of *Akt1* (Izumiya et al.,  
480 2008), or loss of myostatin (*Mstn*; (Mouisel et al., 2014)) *in vivo* not only results in skeletal muscle hypertrophy,  
481 but also increases the glycolytic capacity of the hypertrophying muscles. However, so far there is little data to  
482 show whether increased glycolytic flux limits muscle size. Consistent with our findings (Figure 2), the deletion of  
483 glycolytic enzymes in flies results in smaller muscle fibers (Tixier et al., 2013). In addition to reducing the supply  
484 of glycolytic intermediates as substrates for anabolic reactions, inhibition of glycolysis may also affect the  
485 signalling of energy-sensitive signalling molecules such as AMPK (Hardie, 2015) and increase the expression of



486 E3 ubiquitin ligases (Tong et al., 2009). However, we did not find any effect of the glycolysis inhibitor 2DG on  
487 activity-related AMPK phosphorylation and E3 ligase expression (Figure 3d,e), suggesting that glycolysis  
488 inhibition induced atrophy was likely by attenuation of the rate of protein synthesis. Indeed, phospho-P70S6K  
489 levels were increased by IGF-1 and decreased by 2DG. Mechanistically, under low-glucose conditions, the  
490 glycolytic enzyme GAPDH prevents Rheb from binding mTORC1, thereby inhibiting mTOR signalling,  
491 repressing protein synthesis (Lee et al., 2009).

492  
493 In relation to the association between glycolytic flux and muscle hypertrophy it is worth noting that glycolytic type  
494 2 fibers typically hypertrophy more after resistance training than less glycolytic type 1 fibers (Andersen and  
495 Aagaard, 2000; Kim et al., 2005). This is true even though type 1 fibers have a higher capacity for protein synthesis  
496 than type 2 fibers (van Wessel et al., 2010). Future studies should investigate whether the greater hypertrophic  
497 potential of type 2 fibers is at least in part, because these fibers can provide more glycolytic intermediates as  
498 substrates for anabolic reactions.

499  
500 The third and fourth findings are that a loss (Figure 4) or gain-of-function (Figure 5) of PHGDH decreases or  
501 increases basal and IGF-1-stimulated myotube hypertrophy, respectively. PHGDH was of interest to us because  
502  $\beta$ 2-agonist-mediated muscle hypertrophy in pigs increases the expression and protein levels of PHGDH (Brown  
503 et al., 2016) and *Phgdh* expression almost doubles when muscle hypertrophy is stimulated through synergist  
504 ablation (reanalysis of data from Chaillou et al., 2013)). Our data indicate that PHGDH not only limits cellular  
505 proliferation (Possemato et al., 2011) but also the size of post-mitotic cells. This might seem surprising because  
506 PHGDH catalyses the de novo synthesis of a non-essential amino acids and so one might assume that the loss of  
507 *Phgdh* would have little effect so long as dietary serine intake is sufficient. However, a complete loss of *Phgdh* is  
508 embryonal lethal in mice (Yoshida et al., 2004). *PHGDH* mutations in humans also cause severe inborn diseases,  
509 such as Neu-Laxova syndrome (Shaheen et al., 2014), which is associated with atrophic or underdeveloped skeletal  
510 muscles (Shved et al., 1985). The importance of PHGDH for normal development and muscle size regulation could  
511 be explained through serine's role as a key metabolite for one-carbon metabolism that is linked to nucleotide and  
512 amino acid synthesis, epigenetics and redox defense (Ducker and Rabinowitz, 2017; Reid et al., 2018). A  
513 metabolomics analysis showed that PHGDH is required to maintain nucleotide synthesis (Reid et al., 2018), which  
514 might affect RNA and ribosome biogenesis in muscle cells. Another mechanism through which PHGDH possibly  
515 regulates muscle size is alpha-ketoglutarate. This metabolite is generated downstream of PHGDH and is  
516 diminished by 50% upon PHGDH knockdown (Possemato et al., 2011). Mice supplemented with alpha-



517 ketoglutarate are protected against muscle atrophy and increase protein synthesis, inducing muscle hypertrophy  
518 (Cai et al., 2016). Future studies should seek to identify the mechanism by which PHGDH contributes to muscle  
519 mass in post-mitotic muscle.

520

521 We have already mentioned that  $\beta$ 2-agonists (Brown et al., 2016) and overload-induced hypertrophy (Chaillou et  
522 al., 2013) stimulate the expression of PHGDH, at least temporarily. The fifth finding of this study is that AKT  
523 regulates *Phgdh* expression in post-mitotic C2C12 myotubes (Figure 6). In relation to this, future studies are  
524 needed to find out whether such increased *Phgdh* expression also occurs in mice where overexpression of AKT  
525 causes muscle hypertrophy (Lai et al., 2004) and whether the reduction of PHGDH in these models or in  $\beta$ 2-  
526 induced muscle hypertrophy reduces muscle size.

527

528 Several questions remain unanswered. First, our study only reports *in vitro* data obtained by studying C2C12 and  
529 primary myotubes. Whilst both C2C12 myotubes (Peters et al., 2017; Rommel et al., 2001) and mouse muscles  
530 respond to IGF-1 with hypertrophy (Musaro et al., 2001), it is unclear whether the *in vivo* hypertrophy involves  
531 the same metabolic reprogramming that we report here *in vitro*. Second, whilst 14C is incorporated into protein  
532 (Figure 1) it is unclear whether this is because glucose was a substrate for amino acid and protein synthesis or  
533 whether proteins became glycosylated (Mariño et al., 2010). Future studies can attempt to use de-glycosylation  
534 treatments to verify that carbon from glucose is indeed incorporated into muscle protein.

535

## 536 **5. Conclusion**

537 In summary, this study provides evidence that glycolysis is important in hypertrophying C2C12 and primary mouse  
538 myotubes, reminiscent of cancer-like metabolic reprogramming and that this limits typical myotube size and IGF-  
539 1-stimulated muscle hypertrophy.

540

541 **Author contributions**

542 H.W., R.J., S.G. conceived the original idea; H.W. R.J., L.S., designed the study; L.S., J.S., B.G., T.H., D.K.,  
543 I.V., G.W., C.O., performed the experiments; A.M., designed retroviral plasmid; W.H. provided samples; S.V.,  
544 H.W., R.J. wrote the manuscript; S.V., J.S., B.G., A.M., W.H., H.W., R.T. reviewed and discussed the  
545 manuscript.

546

547 **Ethics approval**

548 This article does not contain any studies with human participants or animals performed by any of the authors.

549

550 **Declaration of Competing Interest**

551 The authors declare no conflict of interest

552

553 **Acknowledgements**

554 B.M.G. was supported by fellowships from the Novo Nordisk Foundation (NNF19OC0055072) & the Wenner-  
555 Gren Foundation, an Albert Renold Travel Fellowship from the European Foundation for the Study of Diabetes  
556 and an Eric Reid Fund for Methodology from the Biochemical Society. A.D.M. was funded initially by Sarcoma  
557 UK (grant number SUK09.2015), then supported by funding from Postdoctoral Fellowship Program (Helmholtz  
558 Zentrum München, Germany) and currently by Cancer Research UK.

559

## 560 References

- 561 Ahtiainen, J.P., Walker, S., Peltonen, H., Holviala, J., Sillanpaa, E., Karavirta, L., Sallinen, J., Mikkola, J.,  
562 Valkeinen, H., Mero, A., *et al.* (2016). Heterogeneity in resistance training-induced muscle strength and mass  
563 responses in men and women of different ages. *Age (Dordrecht, Netherlands)* 38, 10.
- 564 Andersen, J.L., and Aagaard, P. (2000). Myosin heavy chain IIX overshoot in human skeletal muscle. *Muscle &*  
565 *nerve* 23, 1095-1104.
- 566 Arden, N.K., and Spector, T.D. (1997). Genetic influences on muscle strength, lean body mass, and bone mineral  
567 density: a twin study. *JBone MinerRes* 12, 2076-2081.
- 568 Brown, D.M., Williams, H., Ryan, K.J., Wilson, T.L., Daniel, Z.C., Mareko, M.H., Emes, R.D., Harris, D.W.,  
569 Jones, S., Wattis, J.A., *et al.* (2016). Mitochondrial phosphoenolpyruvate carboxykinase (PEPCK-M) and serine  
570 biosynthetic pathway genes are co-ordinately increased during anabolic agent-induced skeletal muscle growth.  
571 *Scientific reports* 6, 28693.
- 572 Cai, X., Zhu, C., Xu, Y., Jing, Y., Yuan, Y., Wang, L., Wang, S., Zhu, X., Gao, P., Zhang, Y., *et al.* (2016). Alpha-  
573 ketoglutarate promotes skeletal muscle hypertrophy and protein synthesis through Akt/mTOR signaling pathways.  
574 *Scientific reports* 6, 26802.
- 575 Chaillou, T., Lee, J.D., England, J.H., Esser, K.A., and McCarthy, J.J. (2013). Time course of gene expression  
576 during mouse skeletal muscle hypertrophy. *Journal of applied physiology (Bethesda, Md : 1985)* 115, 1065-1074.
- 577 DeBerardinis, R.J., and Chandel, N.S. (2016). Fundamentals of cancer metabolism. *Sci Adv* 2, e1600200.
- 578 Ducker, G.S., and Rabinowitz, J.D. (2017). One-Carbon Metabolism in Health and Disease. *Cell metabolism* 25,  
579 27-42.
- 580 Dutchak, P.A., Estill-Terpack, S.J., Plec, A.A., Zhao, X., Yang, C., Chen, J., Ko, B., Deberardinis, R.J., Yu, Y.,  
581 and Tu, B.P. (2018). Loss of a Negative Regulator of mTORC1 Induces Aerobic Glycolysis and Altered Fiber  
582 Composition in Skeletal Muscle. *Cell reports* 23, 1907-1914.
- 583 Elstrom, R.L., Bauer, D.E., Buzzai, M., Karnauskas, R., Harris, M.H., Plas, D.R., Zhuang, H., Cinalli, R.M., Alavi,  
584 A., Rudin, C.M., *et al.* (2004). Akt stimulates aerobic glycolysis in cancer cells. *Cancer Res* 64, 3892-3899.
- 585 Fathinul, F., and Lau, W. (2009). Avid F-FDG uptake of pectoralis major muscle: an equivocal sequela of  
586 strenuous physical exercise. *Biomed Imaging Interv J* 5, e7.
- 587 Gabriel, B.M., and Zierath, J.R. (2017). The Limits of Exercise Physiology: From Performance to Health. *Cell*  
588 *metabolism* 25, 1000-1011.
- 589 Garber, A.J., Karl, I.E., and Kipnis, D.M. (1976). Alanine and glutamine synthesis and release from skeletal  
590 muscle. I. Glycolysis and amino acid release. *Journal of Biological Chemistry* 251, 826-835.
- 591 Gaude, E., and Frezza, C. (2016). Tissue-specific and convergent metabolic transformation of cancer correlates  
592 with metastatic potential and patient survival. *Nature communications* 7, 13041.
- 593 Goodman, C.A. (2019). The Role of mTORC1 in Mechanically-Induced Increases in Translation and Skeletal  
594 Muscle Mass. *Journal of applied physiology* 0, null.
- 595 Hamano, M., Haraguchi, Y., Sayano, T., Zyao, C., Arimoto, Y., Kawano, Y., Moriyasu, K., Udono, M., Katakura,  
596 Y., Ogawa, T., *et al.* (2018). Enhanced vulnerability to oxidative stress and induction of inflammatory gene  
597 expression in 3-phosphoglycerate dehydrogenase-deficient fibroblasts. *FEBS Open Bio* 8, 914-922.
- 598 Hardie, D.G. (2015). AMPK: positive and negative regulation, and its role in whole-body energy homeostasis.  
599 *Current opinion in cell biology* 33, 1-7.
- 600 Hosios, A.M., Hecht, V.C., Danai, L.V., Johnson, M.O., Rathmell, J.C., Steinhauser, M.L., Manalis, S.R., and  
601 Vander Heiden, M.G. (2016). Amino Acids Rather than Glucose Account for the Majority of Cell Mass in  
602 Proliferating Mammalian Cells. *Developmental cell* 36, 540-549.
- 603 Izumiya, Y., Hopkins, T., Morris, C., Sato, K., Zeng, L., Viereck, J., Hamilton, J.A., Ouchi, N., LeBrasseur, N.K.,  
604 and Walsh, K. (2008). Fast/Glycolytic muscle fiber growth reduces fat mass and improves metabolic parameters  
605 in obese mice. *Cell metabolism* 7, 159-172.
- 606 Kim, P.L., Staron, R.S., and Phillips, S.M. (2005). Fasted-state skeletal muscle protein synthesis after resistance  
607 exercise is altered with training. *JPhysiol* 568, 283-290.
- 608 Lai, K.M., Gonzalez, M., Poueymirou, W.T., Kline, W.O., Na, E., Zlotchenko, E., Stitt, T.N., Economides, A.N.,  
609 Yancopoulos, G.D., and Glass, D.J. (2004). Conditional activation of akt in adult skeletal muscle induces rapid  
610 hypertrophy. *MolCell Biol* 24, 9295-9304.
- 611 Lawrence, M.S., Stojanov, P., Polak, P., Kryukov, G.V., Cibulskis, K., Sivachenko, A., Carter, S.L., Stewart, C.,  
612 Mermel, C.H., Roberts, S.A., *et al.* (2013). Mutational heterogeneity in cancer and the search for new cancer-  
613 associated genes. *Nature* 499, 214-218.
- 614 Lee, J., Kim, D., and Kim, C. (2017). Resistance Training for Glycemic Control, Muscular Strength, and Lean  
615 Body Mass in Old Type 2 Diabetic Patients: A Meta-Analysis. *Diabetes Therapy* 8, 459-473.

- 616 Lee, M.N., Ha, S.H., Kim, J., Koh, A., Lee, C.S., Kim, J.H., Jeon, H., Kim, D.-H., Suh, P.-G., and Ryu, S.H.  
617 (2009). Glycolytic flux signals to mTOR through glyceraldehyde-3-phosphate dehydrogenase-mediated regulation  
618 of Rheb. *Molecular and cellular biology* 29, 3991-4001.
- 619 Marcus, R.L., Addison, O., LaStayo, P.C., Hungerford, R., Wende, A.R., Hoffman, J.M., Abel, E.D., and McClain,  
620 D.A. (2013). Regional muscle glucose uptake remains elevated one week after cessation of resistance training  
621 independent of altered insulin sensitivity response in older adults with type 2 diabetes. *J Endocrinol Invest* 36,  
622 111-117.
- 623 Mariño, K., Bones, J., Kattla, J.J., and Rudd, P.M. (2010). A systematic approach to protein glycosylation analysis:  
624 a path through the maze. *Nature Chemical Biology* 6, 713.
- 625 McGlory, C., Devries, M.C., and Phillips, S.M. (2017). Skeletal muscle and resistance exercise training; the role  
626 of protein synthesis in recovery and remodeling. *Journal of applied physiology* 122, 541-548.
- 627 Miller, B.F., Olesen, J.L., Hansen, M., Dossing, S., Cramer, R.M., Welling, R.J., Langberg, H., Flyvbjerg, A.,  
628 Kjaer, M., Babraj, J.A., *et al.* (2005). Coordinated collagen and muscle protein synthesis in human patella tendon  
629 and quadriceps muscle after exercise. *JPhysiol* 567, 1021-1033.
- 630 Moussel, E., Relizian, K., Mille-Hamard, L., Denis, R., Hourde, C., Agbulut, O., Patel, K., Arandel, L., Morales-  
631 Gonzalez, S., Vignaud, A., *et al.* (2014). Myostatin is a key mediator between energy metabolism and endurance  
632 capacity of skeletal muscle. *American journal of physiology Regulatory, integrative and comparative physiology*  
633 307, R444-454.
- 634 Musaro, A., McCullagh, K., Paul, A., Houghton, L., Dobrowolny, G., Molinaro, M., Barton, E.R., Sweeney, H.L.,  
635 and Rosenthal, N. (2001). Localized IGF-1 transgene expression sustains hypertrophy and regeneration in senescent  
636 skeletal muscle. *NatGenet* 27, 195-200.
- 637 Peters, E.L., van der Linde, S.M., Vogel, I.S.P., Haroon, M., Offringa, C., de Wit, G.M.J., Koolwijk, P., van der  
638 Laarse, W.J., and Jaspers, R.T. (2017). IGF-1 Attenuates Hypoxia-Induced Atrophy but Inhibits Myoglobin  
639 Expression in C2C12 Skeletal Muscle Myotubes. *Int J Mol Sci* 18.
- 640 Pillon, N.J., Gabriel, B.M., Dollet, L., Smith, J.A.B., Sardon Puig, L., Botella, J., Bishop, D.J., Krook, A., and  
641 Zierath, J.R. (2020). Transcriptomic profiling of skeletal muscle adaptations to exercise and inactivity. *Nat*  
642 *Commun* 11, 470.
- 643 Possemato, R., Marks, K.M., Shaul, Y.D., Pacold, M.E., Kim, D., Birsoy, K., Sethumadhavan, S., Woo, H.K.,  
644 Jang, H.G., Jha, A.K., *et al.* (2011). Functional genomics reveal that the serine synthesis pathway is essential in  
645 breast cancer. *Nature* 476, 346-350.
- 646 Racker, E. (1972). Bioenergetics and the problem of tumor growth. *Am Sci* 60, 56-63.
- 647 Reid, M.A., Allen, A.E., Liu, S., Liberti, M.V., Liu, P., Liu, X., Dai, Z., Gao, X., Wang, Q., Liu, Y., *et al.* (2018).  
648 Serine synthesis through PHGDH coordinates nucleotide levels by maintaining central carbon metabolism. *Nature*  
649 *communications* 9, 5442.
- 650 Rommel, C., Bodine, S.C., Clarke, B.A., Rossman, R., Nunez, L., Stitt, T.N., Yancopoulos, G.D., and Glass, D.J.  
651 (2001). Mediation of IGF-1-induced skeletal myotube hypertrophy by PI(3)K/Akt/mTOR and PI(3)K/Akt/GSK3  
652 pathways. *NatCell Biol* 3, 1009-1013.
- 653 Ryall, James G., Dell'Orso, S., Derfoul, A., Juan, A., Zare, H., Feng, X., Clermont, D., Koulonis, M., Gutierrez-  
654 Cruz, G., Fulco, M., *et al.* (2015). The NAD<sup>+</sup>-Dependent SIRT1 Deacetylase Translates a Metabolic  
655 Switch into Regulatory Epigenetics in Skeletal Muscle Stem Cells. *Cell stem cell* 16, 171-183.
- 656 Semsarian, C., Sutrave, P., Richmond, D.R., and Graham, R.M. (1999). Insulin-like growth factor (IGF-I) induces  
657 myotube hypertrophy associated with an increase in anaerobic glycolysis in a clonal skeletal-muscle cell model.  
658 *BiochemJ* 339 ( Pt 2), 443-451.
- 659 Shaheen, R., Rahbeeni, Z., Alhashem, A., Faqih, E., Zhao, Q., Xiong, Y., Almoisheer, A., Al-Qattan, S.M.,  
660 Almadani, H.A., Al-Onazi, N., *et al.* (2014). Neu-Laxova syndrome, an inborn error of serine metabolism, is  
661 caused by mutations in PHGDH. *American journal of human genetics* 94, 898-904.
- 662 Shved, I.A., Lazjuk, G.I., and Cherstvoy, E.D. (1985). Elaboration of the phenotypic changes of the upper limbs  
663 in the Neu-Laxova syndrome. *Am J Med Genet* 20, 1-11.
- 664 Tixier, V., Bataillé, L., Etard, C., Jagla, T., Weger, M., DaPonte, J.P., Strähle, U., Dickmeis, T., and Jagla, K.  
665 (2013). Glycolysis supports embryonic muscle growth by promoting myoblast fusion. *Proceedings of the National*  
666 *Academy of Sciences* 110, 18982-18987.
- 667 Tong, J.F., Yan, X., Zhu, M.J., and Du, M. (2009). AMP-activated protein kinase enhances the expression of  
668 muscle-specific ubiquitin ligases despite its activation of IGF-1/Akt signaling in C2C12 myotubes. *Journal of*  
669 *cellular biochemistry* 108, 458-468.
- 670 van Wessel, T., de, H.A., van der Laarse, W.J., and Jaspers, R.T. (2010). The muscle fiber type-fiber size paradox:  
671 hypertrophy or oxidative metabolism? *EurJApplPhysiol* 110, 665-694.
- 672 Vandekeere, S., Dubois, C., Kalucka, J., Sullivan, M.R., Garcia-Caballero, M., Goveia, J., Chen, R., Diehl, F.F.,  
673 Bar-Lev, L., Souffreau, J., *et al.* (2018). Serine Synthesis via PHGDH Is Essential for Heme Production in  
674 Endothelial Cells. *Cell metabolism* 28, 573-587.e513.

- 675 Verbrugge, S.A.J., Schonfelder, M., Becker, L., Yaghoob Nezhad, F., Hrabe de Angelis, M., and Wackerhage, H.  
676 (2018). Genes Whose Gain or Loss-Of-Function Increases Skeletal Muscle Mass in Mice: A Systematic Literature  
677 Review. *Frontiers in physiology* 9, 553.
- 678 Vissing, K., and Schjerling, P. (2014). Simplified data access on human skeletal muscle transcriptome responses  
679 to differentiated exercise. *Sci Data* 1, 140041.
- 680 Warburg, O., Wind, F., and Negelein, E. (1927). The Metabolism of Tumors in the Body. *The Journal of general*  
681 *physiology* 8, 519-530.
- 682 Wolfe, R.R. (2006). The underappreciated role of muscle in health and disease. *AmJClinNutr* 84, 475-482.
- 683 Xi, H., Kurtoglu, M., and Lampidis, T.J. (2014). The wonders of 2-deoxy-d-glucose. *IUBMB Life* 66, 110-121.
- 684 Yoshida, K., Furuya, S., Osuka, S., Mitoma, J., Shinoda, Y., Watanabe, M., Azuma, N., Tanaka, H., Hashikawa,  
685 T., Itohara, S., *et al.* (2004). Targeted disruption of the mouse 3-phosphoglycerate dehydrogenase gene causes  
686 severe neurodevelopmental defects and results in embryonic lethality. *The Journal of biological chemistry* 279,  
687 3573-3577.
- 688
